# Supplementary material for: Seasonal dynamics of terrestrial vertebrate abundance between Amazonian flooded and unflooded forests
Source: PeerJ. 2018 Jun 27;6:e5058. doi: 10.7717/peerj.5058 (PMC6026452; doi:10.7717/peerj.5058)
Supplement: Supplemental Information 1 — Number of detections of 25 terrestrial vertebrate species recorded across the middle Juruá region in unflooded and flooded forests [file peerj-06-5058-s001.xlsx]

## Sheet: Plan1
camera_number	Atelmicr	Crypsp	Cunipaca	Dasyfuli	Dasyspp	Eirabarb	Leoppard	Leopwied	Mazaspp	Mitutube	Myopprat	Myrmtrid	Nasunasu	Pantonca	Pecataja	Priomaxi	Proccanc	Psopleuc	Pumaconc	Herpyago	Sphevena	Tamatetr	Tapiterr	Tayapeca	Tinasp	abun	n_spe	biom	frugi.insect	grani.frugi	frugi	carni	frugi.carni	insect.frugi	insect	brow	frugi.brow
1012	0	0	1	0	1	0	0	0	0	0	0	1	0	0	1	0	0	0	0	0	0	0	0	0	0	4	4	170545	0	1	0	0	0	1	1	0	1
1013	0	0	6	3	1	0	0	0	0	0	1	0	0	0	0	0	0	0	0	0	0	0	0	0	0	11	4	74433.1	0	4	0	0	0	1	0	0	6
1014	0	0	0	0	0	0	0	0	1	0	0	0	0	0	0	0	0	0	0	0	0	0	1	0	0	2	2	219488	0	0	0	0	0	0	0	1	0
1015	0	0	2	0	0	1	0	0	3	1	0	0	0	0	0	0	0	0	0	0	0	0	0	0	0	7	4	112757	0	0	1	0	1	0	0	0	2
1021	0	0	0	6	0	0	0	0	0	0	1	0	0	0	1	0	0	0	0	0	0	0	0	0	0	8	3	157403	0	8	0	0	0	0	0	1	0
1022	0	0	0	4	0	0	0	0	1	0	3	0	0	0	2	0	0	0	0	0	0	0	0	0	0	10	4	299307	0	9	0	0	0	0	0	0	0
1023	0	0	1	2	0	0	0	0	1	0	0	0	0	0	0	0	0	0	0	0	0	0	0	0	0	4	3	47972.3	0	2	0	0	0	0	0	3	1
1024	0	0	1	1	0	1	0	0	0	0	0	0	0	0	0	0	0	0	0	0	0	0	7	0	0	10	4	1.36539e+06	0	1	0	0	1	0	0	9	1
1025	0	0	0	5	0	0	0	0	2	0	0	0	0	0	0	0	0	0	0	0	0	0	0	0	0	7	2	82436.8	0	5	0	0	0	0	0	4	0
1032	0	0	0	0	0	1	0	0	0	0	0	0	0	0	0	0	0	0	0	0	0	0	0	0	0	1	1	6402	0	0	0	0	1	0	0	7	0
1033	1	0	0	1	0	0	0	0	0	0	0	0	0	0	0	0	0	0	0	0	0	0	0	0	0	2	2	14792.2	0	1	0	0	1	0	0	3	0
1034	1	0	1	0	2	0	0	0	0	0	1	0	0	0	0	1	0	0	0	0	0	0	0	0	0	6	5	26692.6	0	1	0	0	1	3	0	0	1
1035	0	0	0	0	0	0	0	0	0	0	0	0	0	0	0	1	0	0	0	0	0	0	0	0	0	1	1	6929.58	0	0	0	0	0	1	0	1	0
1041	0	0	0	4	0	0	0	0	0	0	0	0	0	0	0	0	0	0	0	0	0	0	0	0	0	4	1	21968.8	0	4	0	0	0	0	0	0	0
1042	0	0	0	11	0	0	0	0	1	0	0	0	0	0	0	0	1	0	0	0	0	0	0	0	0	13	3	93302.1	1	11	0	0	0	0	0	4	0
1043	0	0	0	1	0	0	0	0	0	0	0	0	0	0	0	0	0	0	0	0	0	0	0	0	0	1	1	5492.2	0	1	0	0	0	0	0	1	0
1044	0	0	0	0	0	1	0	0	3	0	0	0	0	0	0	0	0	0	0	0	0	0	0	0	0	4	2	88865.7	0	0	0	0	1	0	0	5	0
1045	1	0	0	2	0	0	0	1	2	0	0	0	0	0	2	0	0	2	0	0	0	0	1	0	0	11	7	534122	2	4	0	1	1	0	0	2	0
1051	0	0	0	3	2	0	1	0	4	0	1	0	0	0	0	2	0	0	0	0	0	0	1	0	1	15	8	354851	0	5	0	1	0	4	0	1	0
1052	0	0	2	28	8	0	1	0	7	0	0	0	0	0	1	0	0	1	0	0	0	0	0	0	0	48	7	515680	1	29	0	1	0	8	0	2	2
1053	0	0	2	5	0	1	0	0	3	0	0	0	0	0	2	0	0	0	0	0	0	0	0	0	0	13	5	382327	0	7	0	0	1	0	0	0	2
1054	0	0	0	5	0	0	1	0	0	1	0	0	0	0	2	0	0	0	0	0	0	0	0	0	0	9	4	299352	0	7	1	1	0	0	0	2	0
1061	0	0	0	4	2	0	0	0	1	0	0	0	0	2	0	0	0	0	0	0	0	0	0	0	0	9	4	269470	0	4	0	2	0	2	0	0	0
1062	0	0	5	10	3	0	1	0	0	1	0	0	0	0	0	1	0	2	0	0	0	0	0	0	0	23	7	148124	2	10	1	1	0	4	0	0	5
1063	0	0	2	2	1	1	2	0	4	0	0	0	0	0	1	0	0	13	0	0	0	0	0	0	0	26	8	399945	13	3	0	2	1	1	0	0	2
1064	0	0	2	2	0	2	0	0	1	1	0	0	0	1	0	0	0	0	0	0	0	0	0	0	0	9	6	185167	0	2	1	1	2	0	0	3	2
1065	0	0	2	17	0	0	0	0	5	11	0	0	0	0	1	1	0	0	0	0	0	0	0	0	0	37	6	434038	0	18	11	0	0	1	0	2	2
2011	0	0	0	1	0	0	0	0	1	0	0	1	0	1	0	0	0	2	0	0	0	0	0	0	0	6	5	194380	2	1	0	1	0	0	1	1	0
2012	0	0	3	1	2	0	0	0	0	2	0	0	0	0	0	0	0	2	0	0	0	0	0	0	0	10	5	57649	2	1	2	0	0	2	0	0	3
2013	0	0	2	0	2	0	0	0	2	0	0	0	0	0	1	0	0	0	0	0	0	0	0	0	0	7	4	197489	0	1	0	0	0	2	0	1	2
2014	0	1	0	3	0	0	0	0	0	0	1	0	0	0	1	0	0	0	0	0	0	0	0	0	0	6	4	141512	0	6	0	0	0	0	0	1	0
2015	0	0	1	0	0	1	0	0	2	0	0	0	0	0	1	0	0	0	0	0	0	0	3	0	1	9	6	771979	0	2	0	0	1	0	0	3	1
2021	0	0	2	1	1	0	2	0	0	0	0	0	0	0	0	0	0	1	0	1	0	0	0	0	0	8	6	79429.5	1	1	0	3	0	1	0	5	2
2022	0	0	3	8	2	0	1	0	0	0	0	0	0	0	0	0	0	0	0	0	0	0	1	0	0	15	5	284451	0	8	0	1	0	2	0	1	3
2023	0	0	0	0	2	1	0	0	0	1	1	0	0	0	0	0	0	0	0	0	0	0	0	0	0	5	4	12256	0	1	1	0	1	2	0	1	0
2024	0	0	5	0	2	0	0	1	3	1	1	0	0	0	2	0	0	0	0	0	0	0	0	0	0	15	7	388818	0	3	1	1	0	2	0	1	5
2031	0	0	1	0	0	2	1	0	2	0	0	0	0	0	0	0	0	2	0	0	0	1	0	0	0	9	6	116091	2	0	0	1	2	0	1	2	1
2032	0	0	0	0	0	0	0	0	1	0	0	0	0	0	0	0	0	0	0	0	0	0	0	0	0	1	1	27487.9	0	0	0	0	0	0	0	0	0
2033	0	0	0	3	1	0	0	0	0	0	0	2	0	0	0	0	0	0	0	0	0	0	0	0	0	6	3	91560	0	3	0	0	0	1	2	0	0
2034	0	0	1	3	0	0	0	0	1	0	0	0	0	0	0	0	0	1	0	0	0	0	0	0	0	6	4	60395.3	1	3	0	0	0	0	0	4	1
2035	0	0	0	3	1	0	1	0	1	0	0	0	0	0	0	0	0	1	0	0	0	0	0	0	0	7	5	70901.8	1	3	0	1	0	1	0	1	0
2041	0	0	0	2	0	0	0	0	0	0	0	0	0	0	0	0	0	1	0	0	0	0	0	0	0	3	2	17915.2	1	2	0	0	0	0	0	1	0
2042	0	0	0	2	1	0	0	0	5	0	0	1	1	0	0	1	0	1	0	0	0	0	0	1	0	13	8	2.4465e+06	2	3	0	0	0	2	1	2	0
2043	0	1	1	17	3	0	2	0	0	0	4	3	0	0	2	0	0	11	0	0	0	0	1	0	0	45	10	775127	11	24	0	2	0	3	3	3	1
2044	0	0	0	4	0	2	0	0	1	0	3	0	0	0	1	0	0	0	0	0	0	0	0	0	0	11	5	188611	0	8	0	0	2	0	0	4	0
2051	0	0	0	3	0	0	0	0	1	1	0	0	0	0	0	0	0	0	0	1	0	0	0	0	1	7	5	58456.3	0	4	1	1	0	0	0	0	0
2052	0	0	1	3	0	0	0	0	2	0	0	1	0	0	0	0	0	0	0	0	0	0	0	0	0	7	4	118491	0	3	0	0	0	0	1	0	1
2053	0	0	3	3	0	0	0	0	0	1	1	1	1	0	2	0	0	2	0	0	0	0	0	0	0	14	8	409653	3	6	1	0	0	0	1	2	3
2054	3	1	0	4	0	0	0	0	0	0	0	0	0	1	0	0	0	0	0	0	0	0	0	0	0	9	4	160454	0	5	0	1	3	0	0	0	0
2055	0	0	4	25	0	0	0	0	4	1	0	0	0	0	1	0	0	5	0	0	0	0	2	0	0	42	7	832302	5	26	1	0	0	0	0	3	4
2061	1	0	2	3	1	0	0	0	1	0	0	0	0	0	0	0	0	0	0	0	0	0	0	0	0	8	5	72271	0	3	0	0	1	1	0	1	2
2062	0	0	10	11	1	0	1	0	1	0	0	0	0	0	0	0	0	0	0	0	0	0	1	0	0	25	6	394909	0	11	0	1	0	1	0	3	10
2063	0	0	2	4	1	5	0	0	2	0	0	0	0	0	0	0	0	0	0	0	0	0	0	0	1	15	6	129562	0	5	0	0	5	1	0	6	2
2064	0	0	4	4	2	3	0	0	2	0	0	0	0	0	2	0	0	0	0	0	0	0	0	0	0	17	6	381164	0	6	0	0	3	2	0	1	4
2065	2	0	0	0	0	0	0	0	4	1	0	0	0	0	0	0	0	2	0	0	0	0	1	0	1	11	6	340905	2	1	1	0	2	0	0	1	0
2071	0	0	0	1	1	0	0	0	0	0	0	0	0	0	0	0	0	0	0	0	0	0	0	0	0	2	2	5498.7	0	1	0	0	0	1	0	3	0
2072	0	0	2	2	2	0	0	0	0	0	3	0	0	0	0	0	0	0	0	0	0	0	0	0	0	9	4	32847.4	0	5	0	0	0	2	0	1	2
2073	0	0	0	3	0	0	0	0	2	0	0	0	0	0	2	0	0	2	0	0	0	0	0	0	0	9	4	332314	2	5	0	0	0	0	0	0	0
2074	0	0	2	2	11	0	0	0	0	0	0	0	0	0	0	1	0	0	0	0	0	0	1	0	0	17	5	228985	0	2	0	0	0	12	0	1	2
2081	1	0	0	3	1	0	1	0	1	0	0	0	0	0	0	0	0	0	0	1	0	3	0	0	0	11	7	96121	0	3	0	2	1	1	3	0	0
2082	0	0	1	3	0	0	0	0	1	0	0	0	0	0	0	1	0	2	0	0	0	0	0	0	0	8	5	74255.8	2	3	0	0	0	1	0	0	1
2083	0	0	1	4	0	1	1	0	2	0	0	1	0	1	0	0	0	0	0	0	0	0	0	0	0	11	7	260385	0	4	0	2	1	0	1	0	1
2084	0	0	0	3	0	1	0	0	6	0	0	0	0	2	2	1	0	0	0	0	0	0	0	0	0	15	6	661736	0	5	0	2	1	1	0	0	0
2091	0	0	0	2	0	0	0	0	1	0	0	0	0	0	0	0	0	0	0	0	0	0	0	0	0	3	2	38472.3	0	2	0	0	0	0	0	1	0
2092	0	0	3	10	0	1	1	0	0	0	2	0	0	0	0	0	0	1	0	0	0	0	0	0	1	19	7	120256	1	13	0	1	1	0	0	1	3
2093	0	0	0	11	1	0	0	0	3	0	0	1	1	0	0	0	0	4	0	0	0	0	0	0	0	21	6	268581	5	11	0	0	0	1	1	1	0
2094	0	0	3	7	2	1	0	1	1	0	0	0	0	0	0	1	0	6	0	0	0	0	0	0	0	22	8	155363	6	7	0	1	1	3	0	0	3
2095	0	0	1	0	0	1	0	0	0	1	0	1	0	0	0	0	0	1	0	0	0	0	0	0	0	5	5	65262.4	1	0	1	0	1	0	1	0	1
2101	0	0	4	0	0	0	1	0	0	0	0	0	0	0	0	0	0	0	0	0	0	0	0	0	0	5	2	58000	0	0	0	1	0	0	0	1	4
2102	0	0	2	1	1	0	6	0	0	0	0	0	0	0	0	0	0	0	0	0	0	0	0	0	0	10	4	144499	0	1	0	6	0	1	0	5	2
3011	0	0	1	0	0	0	0	0	0	0	0	0	0	0	0	0	0	0	1	0	0	0	0	0	0	2	2	59000	0	0	0	1	0	0	0	0	1
3012	0	0	4	0	3	0	0	0	0	0	0	0	0	0	0	0	0	0	0	0	0	0	0	0	0	7	2	38019.5	0	0	0	0	0	3	0	1	4
3013	0	0	0	0	0	0	0	0	0	0	0	0	0	0	0	0	0	0	0	0	0	0	0	0	0	0	0	0	0	0	0	0	0	0	0	0	0
3014	0	0	2	3	0	0	0	0	1	1	1	0	0	0	0	0	0	1	0	0	0	0	0	0	0	9	6	75736.4	1	4	1	0	0	0	0	0	2
3015	0	0	0	3	0	2	2	0	1	2	0	0	0	0	0	0	0	0	0	0	0	0	0	0	0	10	5	106551	0	3	2	2	2	0	0	0	0
3021	0	0	1	2	0	0	0	0	1	1	0	2	0	0	0	1	0	0	0	0	0	0	0	0	0	8	6	134870	0	2	1	0	0	1	2	0	1
3022	0	0	0	0	0	0	0	0	0	0	0	1	0	0	0	0	0	0	0	0	0	0	0	0	0	1	1	37538.5	0	0	0	0	0	0	1	0	0
3023	0	0	1	0	2	1	0	0	0	0	0	0	0	0	0	0	0	1	0	0	0	0	0	0	0	5	4	22845.8	1	0	0	0	1	2	0	1	1
3024	0	0	0	0	1	0	0	0	1	0	0	0	1	0	0	1	0	0	0	0	0	0	0	0	0	4	4	94859	1	0	0	0	0	2	0	2	0
3025	0	0	1	3	1	0	0	0	5	1	1	0	0	0	1	0	0	0	0	0	0	0	0	0	0	13	7	292764	0	5	1	0	0	1	0	1	1
3031	1	0	0	0	0	0	0	0	0	0	0	0	0	0	0	0	0	0	0	0	0	0	0	0	0	1	1	9300	0	0	0	0	1	0	0	1	0
3032	0	0	0	1	0	0	0	0	1	0	0	0	0	0	0	0	0	0	2	0	0	1	0	0	0	5	4	136930	0	1	0	2	0	0	1	2	0
3033	0	0	0	0	0	0	0	0	0	0	1	0	0	0	0	0	0	0	0	0	0	0	0	0	0	1	1	950	0	1	0	0	0	0	0	0	0
3034	0	0	0	1	1	2	0	0	0	0	1	0	0	0	0	0	0	0	0	0	0	1	0	0	0	6	5	24202.7	0	2	0	0	2	1	1	0	0
3035	0	0	3	3	1	0	0	0	0	0	0	0	0	0	0	0	0	0	0	0	0	0	0	0	0	7	3	44983.1	0	3	0	0	0	1	0	2	3
3041	0	0	4	2	2	0	0	0	0	0	0	0	0	0	0	0	0	0	0	0	0	0	0	0	0	8	3	48997.4	0	2	0	0	0	2	0	2	4
3042	1	0	4	1	0	0	0	0	0	0	0	0	0	0	0	1	0	0	0	0	0	0	0	0	0	7	4	59721.8	0	1	0	0	1	1	0	0	4
3043	0	0	3	4	1	2	0	0	1	0	0	0	1	0	0	0	0	0	0	0	0	0	0	0	0	12	6	151202	1	4	0	0	2	1	0	3	3
3044	0	0	0	3	5	1	0	0	2	2	3	0	0	0	0	0	0	0	0	0	0	0	0	0	0	16	6	90519	0	6	2	0	1	5	0	5	0
3045	0	0	2	9	1	0	0	0	1	2	1	1	0	0	2	0	0	0	0	0	0	0	0	0	0	19	8	391195	0	12	2	0	0	1	1	1	2
3051	0	0	1	0	1	0	0	0	1	0	0	0	0	0	0	0	0	0	0	0	0	0	0	0	0	3	3	36994.4	0	0	0	0	0	1	0	2	1
3052	0	0	1	0	0	0	0	0	2	1	0	0	0	0	0	0	0	0	0	0	0	0	0	0	2	6	4	72568.3	0	2	1	0	0	0	0	4	1
3053	0	0	0	0	1	0	0	0	0	1	0	1	0	0	0	0	0	1	0	0	0	0	0	0	1	5	5	50967.6	1	1	1	0	0	1	1	2	0
3054	0	0	0	0	0	0	0	0	0	0	0	1	0	0	0	2	0	0	0	0	0	0	0	0	0	3	2	51397.6	0	0	0	0	0	2	1	0	0
3055	0	0	0	4	0	0	1	0	2	5	2	0	0	0	0	0	0	3	0	0	0	0	0	0	0	17	6	144092	3	6	5	1	0	0	0	1	0
3061	0	0	3	0	0	0	0	0	2	1	0	0	0	0	0	0	0	0	0	0	0	0	0	0	0	6	3	88366.9	0	0	1	0	0	0	0	3	3
3062	0	0	0	0	0	0	0	0	0	5	0	0	0	0	1	0	0	4	0	0	0	0	0	0	4	14	4	182081	4	5	5	0	0	0	0	3	0
3063	0	0	0	6	0	0	0	0	3	0	0	1	0	0	1	0	0	1	0	0	0	0	0	0	0	12	5	283386	1	7	0	0	0	0	1	3	0
3064	0	0	0	4	4	0	0	0	5	2	0	0	1	0	1	0	0	1	0	0	0	0	0	0	0	18	7	360082	2	5	2	0	0	4	0	1	0
3065	0	0	10	2	1	0	1	0	1	0	1	0	0	0	0	0	0	0	0	0	0	0	0	0	0	16	6	154429	0	3	0	1	0	1	0	1	10
3071	0	0	4	0	0	0	0	0	2	1	0	0	0	0	0	0	0	0	0	0	0	0	0	0	0	7	3	97866.9	0	0	1	0	0	0	0	1	4
3072	0	0	1	0	0	0	1	0	4	1	0	0	1	0	0	0	0	0	0	0	0	0	1	0	2	11	7	399979	1	2	1	1	0	0	0	1	1
3073	0	0	0	0	0	0	0	1	2	6	0	0	0	0	0	0	0	1	0	0	0	0	1	0	1	12	6	290854	1	1	6	1	0	0	0	1	0
3074	1	0	1	1	8	5	0	1	0	0	15	0	0	0	0	0	0	4	0	0	0	0	0	0	0	36	8	104328	4	16	0	1	6	8	0	0	1
3075	0	0	1	2	6	0	1	0	1	1	5	0	0	0	3	0	0	0	0	0	0	1	0	0	0	21	9	453102	0	10	1	1	0	6	1	3	1
3081	0	0	2	1	0	0	0	0	3	1	1	0	0	0	0	0	0	2	0	0	0	0	0	0	0	10	6	126659	2	2	1	0	0	0	0	3	2
3082	0	0	1	7	6	0	0	0	3	0	3	0	0	0	0	0	0	2	3	0	0	0	0	0	0	25	7	295660	2	10	0	3	0	6	0	4	1
3083	0	0	6	4	1	0	0	0	3	0	0	0	0	0	0	0	0	0	0	0	0	0	2	0	0	16	5	545439	0	4	0	0	0	1	0	4	6
3084	0	0	4	4	0	0	1	0	1	0	0	0	0	0	2	0	0	2	0	0	0	0	0	0	0	14	6	368318	2	6	0	1	0	0	0	6	4
3085	0	0	4	17	2	0	0	0	1	0	16	0	0	0	0	0	0	0	0	0	0	0	0	0	0	40	5	174068	0	33	0	0	0	2	0	0	4
3091	0	0	1	4	0	0	0	0	1	1	0	0	0	0	0	0	0	0	0	0	0	0	0	0	0	7	4	63847.8	0	4	1	0	0	0	0	3	1
3092	0	0	3	0	1	1	0	0	0	0	0	1	0	0	1	0	0	0	0	0	0	0	0	0	0	7	5	195947	0	1	0	0	1	1	1	0	3
3093	0	0	3	9	2	0	0	0	0	3	0	0	0	0	0	0	0	0	0	0	0	0	3	0	7	27	6	679821	0	16	3	0	0	2	0	3	3
3094	0	0	3	0	0	0	3	0	0	1	0	2	0	0	0	0	0	0	0	0	0	0	1	0	2	12	6	363669	0	2	1	3	0	0	2	2	3
4011	0	0	0	0	1	0	0	0	3	0	4	0	0	0	0	0	0	1	0	0	0	0	0	0	0	9	4	93201	1	4	0	0	0	1	0	2	0
4012	0	0	0	5	1	0	0	0	3	0	0	0	0	0	0	0	0	2	0	0	0	0	1	0	0	12	5	315793	2	5	0	0	0	1	0	4	0
4013	0	0	2	5	1	1	0	0	4	0	1	0	0	0	2	1	0	3	0	0	0	0	0	0	0	20	9	438493	3	8	0	0	1	2	0	1	2
4014	2	1	1	10	0	1	1	0	2	5	1	0	0	0	9	0	0	1	0	0	0	0	0	0	0	34	11	1.30882e+06	1	21	5	1	3	0	0	0	1
4015	0	0	0	28	1	0	0	0	6	1	1	0	0	0	0	0	0	7	0	0	0	0	3	0	0	47	7	949072	7	29	1	0	0	1	0	4	0
4022	1	0	2	2	2	1	0	0	0	0	0	1	0	0	0	0	0	3	0	0	0	0	0	0	0	12	7	104030	3	2	0	0	2	2	1	0	2
4023	0	0	6	8	7	1	0	0	3	0	0	0	0	0	1	1	0	6	0	0	0	0	0	5	1	39	10	1.12947e+07	6	15	0	0	1	8	0	1	6
4024	0	0	0	7	0	0	1	0	0	1	0	2	0	0	0	0	0	2	0	0	0	0	0	0	0	13	5	152275	2	7	1	1	0	0	2	3	0
4031	1	0	0	0	0	1	0	0	0	1	1	0	0	0	0	0	0	0	3	0	0	0	0	0	0	7	5	170043	0	1	1	3	2	0	0	0	0
4032	0	0	1	1	0	0	0	0	1	0	0	0	0	0	1	0	0	1	0	0	0	0	0	0	0	5	5	172911	1	2	0	0	0	0	0	0	1
4033	0	0	1	1	5	0	0	0	2	0	1	0	0	0	0	0	0	0	0	0	0	0	0	1	0	11	6	2.25719e+06	0	3	0	0	0	5	0	1	1
4034	0	0	0	0	0	0	0	0	3	0	0	3	0	0	1	0	0	0	0	0	0	0	0	0	0	7	3	318579	0	1	0	0	0	0	3	0	0
4035	0	0	5	6	3	0	0	0	1	5	3	0	0	0	2	0	0	1	0	0	0	0	2	0	1	29	10	774797	1	12	5	0	0	3	0	5	5
4041	0	0	0	0	2	1	0	0	0	0	0	0	0	0	0	0	0	1	0	0	0	2	0	0	0	6	4	23245.8	1	0	0	0	1	2	2	0	0
4042	0	0	1	0	2	4	1	0	1	0	0	0	0	0	0	0	0	1	0	0	0	0	0	0	0	10	6	89539.7	1	0	0	1	4	2	0	1	1
4043	0	0	1	0	0	0	0	0	0	1	0	0	0	0	0	0	0	0	0	0	0	0	0	0	0	2	2	14391	0	0	1	0	0	0	0	0	1
4044	0	0	0	3	0	0	2	0	1	0	1	0	0	0	2	0	0	0	0	0	0	0	2	0	0	11	6	715914	0	6	0	2	0	0	0	3	0
4045	0	0	0	2	0	0	0	0	3	3	4	0	0	0	0	0	0	2	0	0	0	0	0	0	0	14	5	125783	2	6	3	0	0	0	0	1	0
4051	0	0	0	0	0	0	0	0	0	0	0	0	0	0	0	0	0	0	0	0	0	0	0	0	1	1	1	1600.71	0	1	0	0	0	0	0	1	0
4053	1	0	1	0	0	0	0	0	0	0	1	1	0	0	0	0	0	1	1	0	0	0	0	0	1	7	7	115320	1	2	0	1	1	0	1	5	1
4054	0	0	1	5	0	0	0	0	1	2	0	0	0	0	0	0	0	0	0	0	0	0	0	0	1	10	5	75831.7	0	6	2	0	0	0	0	0	1
5011	0	0	8	11	3	1	0	0	0	2	8	0	0	0	2	0	0	1	0	0	0	0	0	0	0	36	8	414149	1	21	2	0	1	3	0	0	8
5012	0	0	1	12	0	0	2	0	3	2	1	0	0	0	0	0	0	5	0	0	0	0	0	0	1	27	8	244857	5	14	2	2	0	0	0	5	1
5013	0	0	2	7	1	0	0	0	0	1	0	0	0	0	0	0	0	0	0	0	0	0	0	0	0	11	4	62343	0	7	1	0	0	1	0	2	2
5014	0	0	1	4	0	0	0	0	1	1	1	0	0	0	0	0	0	0	0	0	0	0	0	0	0	8	5	64797.8	0	5	1	0	0	0	0	3	1
5015	0	0	1	1	0	0	0	0	0	0	7	0	0	0	0	0	0	0	0	0	0	0	0	0	0	9	3	21642.2	0	8	0	0	0	0	0	6	1
5021	0	0	6	0	5	0	0	1	1	1	1	0	0	0	0	0	0	0	0	0	0	0	0	0	0	15	6	96361.4	0	1	1	1	0	5	0	1	6
5022	0	0	4	2	1	1	0	0	1	0	1	0	0	0	3	0	0	0	0	0	0	0	0	0	0	13	7	454331	0	6	0	0	1	1	0	0	4
5023	0	1	2	6	1	1	1	0	1	2	8	1	0	0	1	1	0	0	0	0	0	0	0	0	0	26	12	291785	0	16	2	1	1	2	1	0	2
5024	0	0	4	9	0	3	0	1	5	1	1	2	0	0	1	0	0	1	0	0	0	0	0	0	0	28	10	461424	1	11	1	1	3	0	2	1	4
5025	0	0	1	2	1	2	0	0	0	0	0	0	0	0	0	0	0	0	0	0	0	0	0	0	0	6	4	33294.9	0	2	0	0	2	1	0	2	1
5031	0	0	11	5	0	1	0	0	0	4	0	0	0	0	0	0	0	0	0	0	0	0	2	0	0	23	5	541927	0	5	4	0	1	0	0	7	11
5032	0	0	0	2	0	0	0	0	5	0	0	0	0	0	0	0	0	0	0	0	0	0	0	0	0	7	2	148424	0	2	0	0	0	0	0	1	0
5033	0	1	3	5	0	2	0	0	2	3	7	1	0	0	1	0	0	1	0	0	0	0	0	0	0	26	10	313618	1	14	3	0	2	0	1	5	3
5034	0	0	0	2	0	1	0	0	3	0	1	0	0	0	0	0	0	2	0	0	0	0	0	0	0	9	5	114662	2	3	0	0	1	0	0	10	0
5035	0	0	0	3	0	0	0	0	6	0	0	1	0	0	0	0	0	0	0	0	0	0	0	0	0	10	3	218942	0	3	0	0	0	0	1	2	0
5041	0	2	3	6	0	2	0	0	1	1	0	0	0	1	2	0	0	4	0	0	0	0	0	0	0	22	9	492530	4	10	1	1	2	0	0	11	3
5042	0	0	1	1	0	1	0	0	0	2	0	0	0	0	0	0	0	1	0	0	0	0	0	0	0	6	5	38107.1	1	1	2	0	1	0	0	0	1
5043	0	0	1	6	2	1	0	0	0	0	1	0	0	0	0	0	0	0	0	0	0	0	0	0	1	12	6	51418.9	0	8	0	0	1	2	0	0	1
5044	0	0	1	1	4	0	0	0	1	0	4	0	0	0	0	0	0	1	0	0	0	0	0	0	2	14	7	56438.4	1	7	0	0	0	4	0	4	1
5045	2	0	0	0	0	1	0	0	2	0	0	0	0	0	0	0	0	0	1	0	0	0	0	0	0	6	4	129478	0	0	0	1	3	0	0	2	0
5052	0	0	4	3	1	0	1	0	5	2	0	1	0	0	6	0	0	1	1	0	0	0	0	0	0	25	10	1.05667e+06	1	9	2	2	0	1	1	5	4
5053	0	1	8	4	0	0	0	1	1	2	6	0	0	0	3	0	0	56	0	0	0	0	0	0	0	82	9	906151	56	14	2	1	0	0	0	4	8
5054	4	0	7	5	5	0	1	0	5	16	0	1	1	0	2	0	0	7	0	1	0	0	0	0	0	55	12	768379	8	7	16	2	4	5	1	4	7
5055	0	0	3	8	0	1	1	0	10	2	0	2	0	0	0	0	0	4	0	0	0	0	1	0	0	32	9	678301	4	8	2	1	1	0	2	3	3
5061	0	0	8	1	4	0	0	0	2	1	1	0	0	0	0	0	0	2	0	0	0	0	0	0	0	19	7	156197	2	2	1	0	0	4	0	2	8
5062	0	0	1	3	1	0	0	0	11	0	0	0	0	0	0	0	0	0	0	0	0	0	0	0	0	16	4	328350	0	3	0	0	0	1	0	4	1
5063	0	0	1	2	0	0	0	0	0	0	0	0	0	0	0	0	0	0	0	0	0	0	0	0	0	3	2	20484.4	0	2	0	0	0	0	0	15	1
5064	0	0	0	17	0	0	1	0	0	2	0	0	0	0	0	0	0	0	1	0	0	0	0	0	1	22	5	174250	0	18	2	2	0	0	0	2	0
5065	1	0	3	2	1	0	0	0	4	1	0	0	0	1	0	0	0	4	0	0	0	0	0	0	0	17	8	301357	4	2	1	1	1	1	0	4	3
5072	0	0	2	2	1	1	0	0	2	0	0	2	0	0	1	0	0	0	0	0	0	0	0	0	0	11	7	289946	0	3	0	0	1	1	2	2	2
5073	1	0	1	0	1	0	1	0	5	0	0	0	0	0	0	0	0	6	1	0	0	0	0	0	0	16	7	267331	6	0	0	2	1	1	0	0	1
5074	0	0	4	7	3	0	0	0	4	0	0	1	0	0	0	1	0	3	0	0	0	1	0	0	0	24	8	256627	3	7	0	0	0	4	2	3	4
5075	0	0	3	2	1	0	0	0	4	2	1	0	0	0	3	0	0	3	0	0	0	0	0	0	0	19	8	551467	3	6	2	0	0	1	0	2	3
5081	0	0	1	4	0	0	0.854545	0.0727273	2	1	0	0	1	0	0	0	0	1	0	0.0727273	0	0	0	0	0	11	9	176811	2	4	1	1	0	0	0	1	1
5082	0	4	8	16	6	0	0	0	2	2	7	2	0	1	2	0	0	2	1	0	0	0	0	1	2	56	14	2.92254e+06	2	32	2	2	0	6	2	1	8
5083	0	0	2	26	4	2	1	0	4	5	0	0	0	0	1	0	0	8	0	0	0	0	0	0	0	53	9	507981	8	27	5	1	2	4	0	1	2
5084	0	0	2	7	0	4	0	0	15	2	0	3	0	0	0	0	0	0	0	0	0	1	0	0	0	34	7	622719	0	7	2	0	4	0	4	0	2
5085	0	0	4	6	0	1	0	0	2	4	0	1	0	1	1	2	0	0	0	0	0	0	0	0	0	22	9	436793	0	7	4	1	1	2	1	4	4
5091	0	1	2	0	0	1	0	0	4	0	0	1	0	0	0	0	0	0	0	0	0	0	0	0	0	9	5	173477	0	1	0	0	1	0	1	1	2
5092	0	0	8	9	0	0	0	0	2	2	0	2	0	0	0	0	0	0	0	1	0	0	0	0	0	24	6	273265	0	9	2	1	0	0	2	0	8
5093	0	1	0	6	4	1	0	0	0	1	1	0	0	0	0	0	0	0	0	0	0	0	0	0	0	14	6	45807.5	0	8	1	0	1	4	0	4	0
5094	3	0	0	0	0	0	0	0	3	1	1	0	0	0	2	2	0	0	0	0	0	0	1	0	0	13	7	569064	0	3	1	0	3	2	0	1	0
5095	0	0	0	0	0	0	0	0	2	0	2	0	0	0	0	0	0	1	0	0	0	0	1	0	0	6	4	255807	1	2	0	0	0	0	0	1	0
5101	0	0	0	1	2	0	0	0	1	0	0	0	0	0	1	0	0	0	0	0	0	0	0	0	0	5	4	156493	0	2	0	0	0	2	0	1	0
5102	0	0	1	1	0	0	0	0	1	0	1	0	0	0	1	0	1	0	0	0	0	0	0	0	0	6	6	172330	1	3	0	0	0	0	0	0	1
5103	0	0	1	11	1	0	0	0	1	1	0	0	0	0	1	0	0	0	0	0	0	0	0	0	0	16	6	225800	0	12	1	0	0	1	0	3	1
5104	0	1	1	6	0	1	0	0	0	0	11	3	0	0	0	0	0	3	0	0	0	0	2	0	0	28	8	577298	3	18	0	0	1	0	3	2	1
6011	0	0	1	0	0	1	0	0	4	1	0	2	1	0	0	0	0	0	0	0	0	0	0	0	0	10	6	266257	1	0	1	0	1	0	2	0	1
6013	0	3	3	1	1	4	0	0	1	2	0	0	2	1	0	0	0	0	0	0	0	0	0	0	0	18	9	329502	2	4	2	1	4	1	0	2	3
6022	0	0	0	0	0	1	0	0	0	0	0	1	0	0	0	0	0	0	0	0	0	0	0	0	0	2	2	43940.5	0	0	0	0	1	0	1	5	0
6023	1	1	2	0	2	0	0	0	4	1	4	0	0	0	0	0	0	19	0	1	0	0	0	0	0	35	9	287227	19	5	1	1	1	2	0	4	2
6024	0	0	0	0	0	0	0	0	0	1	0	0	0	0	0	0	0	1	0	0	0	0	0	0	0	2	2	11821.9	1	0	1	0	0	0	0	8	0
6025	0	0	5	0	0	2	4	0	0	4	0	0	1	1	0	0	0	0	0	0	0	0	1	0	0	18	7	522303	1	0	4	5	2	0	0	2	5
6033	0	11	2	5	0	2	0	1	1	1	0	0	0	0	1	1	0	0	0	0	0	0	0	1	2	28	11	2.42395e+06	0	20	1	1	2	1	0	3	2
6034	0	2	2	1	0	2	0	0	0	1	0	0	0	0	0	0	0	0	0	0	0	0	0	0	0	8	5	43357.7	0	3	1	0	2	0	0	0	2
6042	0	1	1	0	1	1	0	0	3	0	0	0	1	0	0	0	0	1	0	0	0	0	0	0	0	9	7	166323	2	1	0	0	1	1	0	3	1
6044	0	0	1	4	0	0	0	0	0	0	0	0	0	0	0	0	0	3	0	0	0	2	0	0	0	10	4	62161.3	3	4	0	0	0	0	2	0	1
6045	0	0	2	0	0	0	0	0	0	0	0	0	0	0	0	0	0	2	0	0	0	0	0	0	0	4	2	32861.7	2	0	0	0	0	0	0	2	2
TF01	0	0	5	1	2	0	0	0	2	2	0	0	0	0	0	0	0	2	0	0	0	0	1	0	0	15	7	323625	2	1	2	0	0	2	0	2	5
TF02	0	0	0	0	0	0	0	0	5	0	0	0	0	0	1	0	0	1	0	0	0	0	0	0	0	7	3	267870	1	1	0	0	0	0	0	4	0
TF03	0	0	5	5	0	0	1	0	4	7	0	1	0	1	0	0	0	0	2	0	0	0	0	0	0	26	8	485688	0	5	7	4	0	0	1	4	5
TF04	2	0	1	5	2	0	0	0	8	1	0	0	0	0	9	0	0	0	0	0	0	0	1	0	0	29	8	1.58387e+06	0	14	1	0	2	2	0	2	1
TF05	0	0	5	1	5	0	0	0	1	1	0	0	0	0	1	6	0	7	0	0	0	0	2	0	0	29	9	682997	7	2	1	0	0	11	0	2	5
TF06	0	0	7	5	4	1	0	0	3	2	0	0	0	0	0	0	0	0	0	0	0	0	0	0	0	22	6	192635	0	5	2	0	1	4	0	2	7
TF07	0	0	0	0	0	0	0	0	0	7	0	4	0	0	0	0	0	1	0	0	0	0	0	0	0	12	3	191322	1	0	7	0	0	0	4	2	0
TF08A	0	0	4	5	0	0	0	0	3	0	1	0	0	0	2	0	0	0	0	0	0	0	0	0	0	15	5	395875	0	8	0	0	0	0	0	0	4
TF08B	0	0	0	0	0	1	0	0	0	0	1	0	0	0	3	0	0	0	0	0	0	0	0	1	0	6	4	2564092	0	5	0	0	1	0	0	0	0
TF09	0	0	2	15	0	0	0	0	2	0	1	2	0	3	1	1	0	9	1	0	0	0	0	0	0	37	10	804693	9	17	0	4	0	1	2	3	2
TF10	0	0	0	7	0	0	0	0	1	0	1	0	0	0	5	0	0	0	0	0	0	0	0	0	0	14	4	684383	0	13	0	0	0	0	0	3	0
TF11	0	0	3	5	0	1	1	0	4	7	0	0	0	2	0	0	0	1	1	0	0	0	3	0	0	28	10	1.07898e+06	1	5	7	4	1	0	0	3	3
TF12	0	0	4	2	0	0	0	0	4	4	0	0	0	0	0	0	0	1	0	0	0	0	0	0	0	15	5	185431	1	2	4	0	0	0	0	2	4
TF13	0	0	0	0	0	0	1	0	1	1	0	0	0	0	0	1	0	2	0	0	0	0	0	0	0	6	5	73170.2	2	0	1	1	0	1	0	4	0
TF14	0	0	1	0	0	0	0	0	0	0	0	1	0	0	1	1	0	0	0	0	0	0	1	0	0	5	5	369468	0	1	0	0	0	1	1	1	1
TF15	0	0	7	1	0	0	0	0	2	7	0	2	0	0	0	0	0	10	0	0	0	0	0	1	0	30	7	2.49183e+06	10	2	7	0	0	0	2	0	7
TF16	0	0	0	2	1	0	0	0	2	0	0	0	0	0	0	0	0	1	0	0	0	0	0	0	0	6	4	72897.5	1	2	0	0	0	1	0	0	0
TF17	NA	NA	NA	NA	NA	NA	NA	NA	NA	NA	NA	NA	NA	NA	NA	NA	NA	NA	NA	0	0	NA	NA	NA	NA	NA	NA	NA	0	0	NA	0	NA	0	0	1	NA
TF18	NA	NA	NA	NA	NA	NA	NA	NA	NA	NA	NA	NA	NA	NA	NA	NA	NA	NA	NA	0	0	NA	NA	NA	NA	NA	NA	NA	0	0	NA	0	NA	0	0	4	NA
TF18B	0	0	1	0	0	0	0	0	3	0	0	0	1	0	0	1	0	0	0	0	0	0	0	0	0	6	4	159328	1	0	0	0	0	1	0	5	1
TF20	0	0	3	1	2	0	0	0	3	0	0	1	0	1	1	1	0	4	0	0	0	0	0	0	0	17	9	422160	4	2	0	1	0	3	1	0	3
TF21	NA	NA	NA	NA	NA	NA	NA	NA	NA	NA	NA	NA	NA	NA	NA	NA	NA	NA	NA	0	0	NA	NA	NA	NA	NA	NA	NA	0	0	NA	0	NA	0	0	4	NA
TF21A	0	1	2	1	0	0	0	0	2	4	2	0	1	0	8	2	0	8	0	0	0	0	1	0	0	32	11	1.41126e+06	9	12	4	0	0	2	0	1	2
TF22	0	0	3	1	1	1	0	0	4	2	0	0	0	0	1	0	0	11	0	0	0	0	0	0	6	30	9	369478	11	8	2	0	1	1	0	1	3
TF23	NA	NA	NA	NA	NA	NA	NA	NA	NA	NA	NA	NA	NA	NA	NA	NA	NA	NA	NA	0	0	NA	NA	NA	NA	NA	NA	NA	0	0	NA	0	NA	0	0	2	NA
TF24	NA	NA	NA	NA	NA	NA	NA	NA	NA	NA	NA	NA	NA	NA	NA	NA	NA	NA	NA	0	0	NA	NA	NA	NA	NA	NA	NA	0	0	NA	0	NA	0	0	5	NA
TF25	NA	NA	NA	NA	NA	NA	NA	NA	NA	NA	NA	NA	NA	NA	NA	NA	NA	NA	NA	0	0	NA	NA	NA	NA	NA	NA	NA	0	0	NA	0	NA	0	0	0	NA
TF26	0	0	13	1	2	0	1	0	1	0	0	0	0	0	1	0	0	2	1	0	0	0	0	0	2	24	9	366556	2	4	0	2	0	2	0	0	13
TF27	2	0	0	13	0	0	3	0	4	5	0	0	0	0	1	0	0	1	0	0	0	0	0	0	0	29	7	414836	1	14	5	3	2	0	0	1	0
TF28	0	0	3	5	0	0	0	0	5	6	0	0	0	0	2	0	2	4	0	0	0	0	1	0	0	28	8	700270	6	7	6	0	0	0	0	1	3
VZ01	0	0	0	0	0	0	1	0	0	0	0	0	0	0	0	0	0	0	0	0	0	0	0	0	0	1	1	20000	0	0	0	1	0	0	0	0	0
VZ02	0	0	7	3	0	0	0	0	4	1	0	0	0	0	1	0	0	0	0	0	0	0	9	0	0	25	6	2.04932e+06	0	4	1	0	0	0	0	9	7
VZ03	0	0	0	0	0	0	0	0	0	2	0	0	0	1	0	0	0	0	0	0	0	0	2	0	0	5	3	503782	0	0	2	1	0	0	0	3	0
VZ04	0	0	0	0	0	1	1	0	1	6	0	0	0	0	0	0	0	0	0	0	0	0	0	0	0	9	4	83236.2	0	0	6	1	1	0	0	1	0
VZ05	0	0	0	0	0	0	0	0	2	0	0	0	0	0	0	0	0	0	0	0	0	0	0	3	0	5	2	6.6137e+06	0	3	0	0	0	0	0	0	0
VZ06	0	0	0	0	0	0	0	0	5	4	0	0	0	0	1	0	0	0	0	0	0	0	3	0	0	13	4	856504	0	1	4	0	0	0	0	3	0
VZ08	0	0	0	0	0	1	0	0	0	1	0	0	0	0	0	0	0	0	0	0	0	0	0	0	0	2	2	11293	0	0	1	0	1	0	0	1	0
VZ09	0	0	0	0	0	0	0	0	0	4	0	0	0	0	0	0	0	0	0	0	0	0	0	0	0	4	1	19564.2	0	0	4	0	0	0	0	1	0
VZ10	0	2	0	0	0	2	0	0	1	0	0	0	0	0	0	0	0	0	0	0	0	0	0	0	0	5	3	41462.3	0	2	0	0	2	0	0	0	0
VZ11	0	0	1	0	0	0	2	0	0	2	0	0	0	0	0	0	0	0	0	0	0	1	1	0	0	7	5	256232	0	0	2	2	0	0	1	1	1
VZ12	0	18	0	0	0	0	0	0	0	5	0	0	0	0	0	0	0	0	1	0	0	0	0	0	0	24	3	84489.2	0	18	5	1	0	0	0	7	0
VZ13	0	0	0	0	0	0	1	0	0	0	0	0	0	0	1	0	0	0	0	0	0	0	0	0	0	2	2	143500	0	1	0	1	0	0	0	0	0
VZ14	0	0	0	0	0	0	1	0	1	2	0	0	0	0	0	0	0	0	0	0	0	0	0	0	0	4	3	57270	0	0	2	1	0	0	0	0	0
VZ15	0	0	1	0	0	0	0	0	1	7	0	0	0	0	0	0	0	0	0	0	0	0	0	0	0	9	3	71225.2	0	0	7	0	0	0	0	1	1
VZ16	0	0	0	0	0	1	0	0	0	5	0	0	0	0	0	0	0	0	0	0	0	0	0	0	0	6	2	30857.2	0	0	5	0	1	0	0	4	0
VZ17	0	0	0	0	0	0	0	0	0	1	0	0	0	0	0	0	0	0	0	0	0	0	0	0	0	1	1	4891.05	0	0	1	0	0	0	0	0	0
VZ18	0	0	0	0	0	0	0	0	1	1	0	0	0	0	0	0	0	0	1	0	0	0	0	0	0	3	3	81878.9	0	0	1	1	0	0	0	3	0
VZ19	0	0	6	0	0	0	2	0	1	5	0	0	0	2	1	0	0	0	1	0	0	0	1	0	0	19	8	733943	0	1	5	5	0	0	0	5	6
VZ20	0	0	18	13	2	0	2	0	0	7	0	2	0	0	0	0	0	0	0	0	0	0	1	0	0	45	7	583726	0	13	7	2	0	2	2	5	18
VZ21	0	0	0	0	0	0	0	0	0	1	0	0	0	0	0	0	0	0	0	0	0	0	0	0	0	1	1	4891.05	0	0	1	0	0	0	0	5	0
VZ22A	0	0	0	0	0	0	0	0	7	0	0	0	0	0	0	0	0	0	0	0	0	0	0	0	0	7	1	192415	0	0	0	0	0	0	0	3	0
VZ23	0	0	14	0	0	0	0	1	0	0	0	0	0	1	0	0	0	0	0	0	0	0	2	0	0	18	4	633000	0	0	0	2	0	0	0	4	14
VZ24	0	0	2	0	0	1	1	0	0	0	0	0	0	0	0	0	0	3	0	0	0	0	0	0	0	7	4	66194.5	3	0	0	1	1	0	0	3	2
VZ25	0	0	0	0	0	0	0	0	1	0	0	0	0	0	0	0	0	0	0	0	0	0	0	0	0	1	1	27487.9	0	0	0	0	0	0	0	5	0
VZ26	0	0	0	0	0	0	0	0	4	0	0	0	0	0	0	0	0	0	1	0	0	1	0	0	0	6	3	164402	0	0	0	1	0	0	1	0	0
VZ28	0	0	0	0	0	0	1	0	0	0	0	0	0	0	0	0	0	0	1	0	0	0	0	0	0	2	2	69500	0	0	0	2	0	0	0	1	0
TF01w	0	0	1	1	2	1	0	2	3	5	0	0	0	1	8	0	0	5	1	0	0	0	0	0	0	30	11	1.32248e+06	5	9	5	4	1	2	0	0	1
TF02w	0	0	0	14	1	0	1	1	4	11	0	0	0	0	2	1	0	11	0	0	0	0	0	0	0	46	9	596819	11	16	11	2	0	2	0	3	0
TF03w	0	0	0	0	0	0	0	0	4	5	0	0	0	0	5	0	0	0	0	0	0	0	0	0	0	14	3	751907	0	5	5	0	0	0	0	9	0
TF04w	0	0	2	6	0	0	0	0	5	0	0	0	0	0	0	0	0	1	0	0	0	0	0	0	0	14	4	196324	1	6	0	0	0	0	0	2	2
TF05w	0	0	3	14	2	1	1	0	3	2	0	0	0	0	5	0	0	10	0	0	0	0	0	0	0	41	9	910860	10	19	2	1	1	2	0	3	3
TF06w	0	0	4	37	3	0	2	2	2	3	2	0	1	1	1	1	0	1	0	0	0	0	0	0	1	61	14	674176	2	41	3	5	0	4	0	1	4
TF07w	0	0	0	3	0	0	2	0	3	1	0	2	0	0	2	0	0	3	0	0	0	0	0	0	0	16	7	486701	3	5	1	2	0	0	2	10	0
TF08Aw	0	0	9	10	0	0	0	0	5	0	1	0	0	0	7	0	0	3	0	0	0	0	1	0	0	36	7	1.3561e+06	3	18	0	0	0	0	0	4	9
TF08Bw	0	0	3	12	0	0	0	0	0	0	0	0	0	0	1	0	0	1	0	0	0	0	0	0	0	17	4	224837	1	13	0	0	0	0	0	9	3
TF09w	0	0	0	7	0	0	0	0	1	0	2	0	0	0	0	0	0	1	0	0	0	0	0	0	0	11	4	74764.1	1	9	0	0	0	0	0	0	0
TF10w	0	0	4	20	2	0	3	0	0	7	0	0	0	0	2	0	0	0	1	0	0	0	1	0	0	40	8	730594	0	22	7	4	0	2	0	4	4
TF11w	0	0	14	27	2	3	1	1	3	16	5	0	0	0	0	0	0	2	0	0	0	0	0	0	0	74	10	505841	2	32	16	2	3	2	0	0	14
TF12w	0	0	2	12	2	0	1	0	9	2	0	0	0	0	0	0	0	0	1	0	0	0	0	0	1	30	8	413193	0	13	2	2	0	2	0	4	2
TF13w	0	0	0	4	0	0	1	0	2	2	0	0	0	0	2	0	0	1	1	0	0	0	0	0	0	13	7	410158	1	6	2	2	0	0	0	1	0
TF14w	0	0	1	6	0	1	0	0	3	5	1	0	0	0	0	0	0	2	0	0	0	0	0	0	0	19	7	170586	2	7	5	0	1	0	0	0	1
TF15w	0	0	0	0	0	6	2	1	1	9	0	1	0	0	0	1	0	5	0	0	1	0	0	0	0	27	9	271042	5	0	9	4	6	1	1	0	0
TF16w	0	1	0	1	1	0	0	0	10	4	1	3	0	0	1	0	0	12	0	0	0	0	0	0	2	36	10	623964	12	6	4	0	0	1	3	6	0
TF17w	0	0	3	0	0	1	2	0	3	0	0	1	0	1	0	0	0	2	0	0	0	0	0	0	0	13	7	318766	2	0	0	3	1	0	1	0	3
TF18w	0	0	1	5	0	0	3	0	9	1	0	0	0	1	0	0	0	2	0	0	0	0	0	0	0	22	7	473105	2	5	1	4	0	0	0	0	1
TF18Bw	NA	NA	NA	NA	NA	NA	NA	NA	NA	NA	NA	NA	NA	NA	NA	NA	NA	NA	NA	0	NA	NA	NA	NA	NA	NA	NA	NA	0	0	NA	0	NA	0	0	0	NA
TF20w	1	0	0	2	0	0	0	0	3	0	1	0	0	0	3	0	0	1	0	0	0	0	0	0	0	11	6	481129	1	6	0	0	1	0	0	0	0
TF21w	0	0	0	1	0	0	0	0	0	0	0	0	0	1	1	0	0	2	0	0	0	0	0	0	0	5	4	252854	2	2	0	1	0	0	0	0	0
TF21Aw	0	0	1	0	0	0	0	0	4	0	0	0	0	0	0	0	0	1	0	0	0	0	0	0	0	6	3	126382	1	0	0	0	0	0	0	0	1
TF22w	0	0	0	3	0	0	1	0	1	0	1	0	0	0	2	0	0	9	2	0	0	0	0	0	0	19	7	473292	9	6	0	3	0	0	0	0	0
TF23w	4	0	0	0	0	0	0	0	0	1	0	0	0	0	0	0	0	0	0	0	0	0	0	0	0	5	2	42091.1	0	0	1	0	4	0	0	0	0
TF24w	0	0	1	3	0	0	0	0	0	0	0	0	0	0	0	1	0	0	0	0	0	0	0	0	0	5	3	32906.2	0	3	0	0	0	1	0	0	1
TF25w	0	0	7	4	2	0	0	0	6	6	2	0	0	1	0	0	0	0	0	0	0	0	5	0	1	34	9	1.35626e+06	0	7	6	1	0	2	0	5	7
TF26w	NA	NA	NA	NA	NA	NA	NA	NA	NA	NA	NA	NA	NA	NA	NA	NA	NA	NA	NA	0	NA	NA	NA	NA	NA	NA	NA	NA	0	0	NA	0	NA	0	0	0	NA
TF27w	1	0	0	5	1	0	3	2	0	0	8	0	0	1	2	0	0	0	0	0	0	0	0	0	0	23	8	473368	0	15	0	6	1	1	0	0	0
TF28w	NA	NA	NA	NA	NA	NA	NA	NA	NA	NA	NA	NA	NA	NA	NA	NA	NA	NA	NA	0	NA	NA	NA	NA	NA	NA	NA	NA	0	0	NA	0	NA	0	0	0	NA
