# Supplementary material for: Seasonal dynamics of terrestrial vertebrate abundance between Amazonian flooded and unflooded forests
Source: PeerJ. 2018 Jun 27;6:e5058. doi: 10.7717/peerj.5058 (PMC6026452; doi:10.7717/peerj.5058)
Supplement: Supplemental Information 2 — Abbreviations and Linnean binomials of 25 terrestrial vertebrate species recorded across the middle Juruá region in unflooded and flooded forests [file peerj-06-5058-s002.xlsx]

## Sheet: Plan1
Abreviation	Description
camera_number	Camera trap field code
Atelmicr	Atelocynus microtis
Crypsp	Crypturellus spp
Cunipaca	Cuniculus paca
Dasyfuli	Dasyprocta fuliginosa
Dasyspp	Dasypus spp
Eirabarb	Eira barbara
Leoppard	Leopardus pardalis
Leopwied	Leopardus wiedii
Mazaspp	Mazama spp
Mitutube	Mitu tuberosum
Myopprat	Myoprocta pratti
Myrmtrid	Myrmecophaga tridactyla
Nasunasu	Nasua nasua
Pantonca	Panthera onca
Pecataja	Pecari tajacu
Priomaxi	Priodontes maximus
Proccanc	Procyon cancrivorus
Psopleuc	Psophia leucoptera
Pumaconc	Puma concolor
Herpyago	Herpailurus yagouaroundi
Sphevena	Speothos venaticus
Tamatetr	Tamandua tetradactyla
Tapiterr	Tapirus terrestris
Tayapeca	Tayassu pecari
Tinasp	Tinamus sp
abun	aggregate abundace
n_spe	species richness
biom	aggregate species biomass
frugi.insect	frugivore-insectivore
grani.frugi	granivore-frugivore
frugi	frugivore
carni	carnivore
frugi.carni	frugivore-carnivore
insect.frugi	insectivore-frugivore
insect	insectivore
brow	browser
frugi.brow	frugivore-browser
