# Supplementary material for: Seasonal dynamics of terrestrial vertebrate abundance between Amazonian flooded and unflooded forests
Source: PeerJ. 2018 Jun 27;6:e5058. doi: 10.7717/peerj.5058 (PMC6026452; doi:10.7717/peerj.5058)
Supplement: Supplemental Information 3 — Landscape and human disturbance variables extracted from 279 camera trap stations in the middle Juruá region, Amazonas, Brazil. [file peerj-06-5058-s003.xlsx]

## Sheet: Plan1
camera_number	phase	sampledesign	waterlevel	tnights	habitat	vz500	vz1k	vz5k	defor500	defor1k	defor5k	vzdist	defordist	elev	riverdist	popcomm1	comdist1	citydist
1012	high_water	D1	14.02	29.6861	tf	0	0	15962876	0	17590	6134350	2091.38	866.108	31	3812.37	18.9167	3351.19	75459.6
1013	high_water	D1	14.02	29.9819	tf	0	0	12716234	0	0	5743123	2695.96	1509.4	32	4446.62	18.9167	3965.76	75522.7
1014	high_water	D1	14.02	30.0514	tf	0	0	860418	0	0	3077609	4486.65	3442.86	31	6452.68	18.9167	5952.86	75946
1015	high_water	D1	14.02	29.9535	tf	0	0	0	0	0	32843	6666.11	4745.54	50	9192.01	18.9167	8661.14	76234.9
1021	high_water	D1	14.01	29.9951	tf	105972	812524	10256998	0	0	228337	287.559	2666.93	34	10070.8	4	9725.89	86813.2
1022	high_water	D1	14.01	29.9764	tf	148	444062	10550914	0	0	306204	494.574	2380.32	36	10066.2	4	9438.69	86514.8
1023	high_water	D1	14.01	29.9681	tf	0	0	11179874	0	0	436315	1161.24	1829.33	36	10272	4	8849.15	85839.9
1024	high_water	D1	14.01	29.9257	tf	0	0	11433112	0	0	768412	2459.37	1377.29	29	9529.13	4	7276.97	83938.6
1025	high_water	D1	14.01	29.8521	tf	0	0	4710161	0	0	342419	3575.56	3470.72	39	8667.22	4	6825.04	82299.6
1032	high_water	D1	14	29.8764	tf	0	0	14307185	231936	1085209	8024950	1493.91	96.3185	25	1937.03	27.2083	1856.19	66717.6
1033	high_water	D1	14	29.8549	tf	0	0	10011702	104683	507106	7906219	2117.81	174.94	28	2593.56	27.2083	2501.69	67027.4
1034	high_water	D1	14	29.8549	tf	0	0	1274883	0	0	5929681	3888.17	1299.85	51	4579.97	27.2083	4475.48	67996.6
1035	high_water	D1	14	29.8562	tf	0	0	0	15372	15704	977816	6801.77	343.316	40	7535.41	27.2083	7414.3	69232.7
1041	high_water	D1	13.99	30.0139	tf	0	0	11151214	0	67459	7753539	2457.96	571.665	39	2938.16	27.2083	2777.67	64823.9
1042	high_water	D1	13.99	30.0049	tf	0	0	10254325	0	17170	7504371	2730.41	828.387	40	3207.14	27.2083	3076.8	64623.5
1043	high_water	D1	13.99	29.9931	tf	0	0	10339009	0	24	7585466	3053.7	997.364	38	3613.84	27.2083	3571.22	64046.4
1044	high_water	D1	13.99	29.9917	tf	0	0	4685250	0	0	5075008	3358.38	1564.18	43	5540.18	27.2083	5567.92	62984.5
1045	high_water	D1	13.99	29.9681	tf	0	0	208650	0	15704	590188	4631.91	807.384	44	8421.35	27.2083	8549.63	61505.2
1051	high_water	D1	13.95	30.9319	tf	55154	358553	21803240	135884	293704	915821	177.309	141.732	27	8026.64	6	1052.02	77515.8
1052	high_water	D1	13.95	30.7181	tf	985	228776	21498267	0	182832	783055	469.961	544.428	33	8233.26	6	1343.55	77833.8
1053	high_water	D1	13.95	30.9028	tf	0	13593	21133123	0	0	778426	920.211	1185.24	31	8544.22	6	1872.18	78381
1054	high_water	D1	13.95	30.8826	tf	0	0	16580894	0	0	774973	1641.65	3194.91	29	9806.86	6	3803.37	79978
1061	high_water	D1	13.95	30.9813	tf	11881	285907	32689121	369823	924339	1967193	362.243	59.3552	29	9510.44	24.625	1434.95	92079
1062	high_water	D1	13.95	31.0646	tf	12013	155471	30727390	169728	830335	1975197	362.541	214.844	31	9724.78	24.625	1657.01	92281.2
1063	high_water	D1	13.95	31.0222	tf	0	31175	25836943	0	143964	2225041	846.588	699.82	31	10292.5	24.625	2271.32	92723.4
1064	high_water	D1	13.95	30.8826	tf	0	0	15707682	0	0	2142691	2135.5	1099.86	27	11590.5	24.625	3557.9	92984.2
1065	high_water	D1	13.95	30.8965	tf	0	0	13571735	0	0	2143257	2386.34	1143.4	22	11806.7	24.625	3733.15	92504.2
2011	high_water	D1	10.45	29.9384	tf	785191	2845125	37397402	82423	125631	744225	-619.957	226.099	20	3002.36	8	9232.81	22918.4
2012	high_water	D1	10.45	29.925	tf	743899	2410936	35748337	15846	126341	717269	-321.867	372.571	26	3283.7	8	9463.1	23079.3
2013	high_water	D1	10.45	29.9056	tf	320672	1495396	32537053	0	94610	576558	36.6323	610.489	39	3795.53	8	9894.85	23367.7
2014	high_water	D1	10.45	29.8625	tf	0	0	20700565	0	0	414707	1282.4	1510.72	34	5658.2	8	11461.3	24407.3
2015	high_water	D1	10.45	29.8257	tf	0	0	4393446	0	0	100101	3638.86	3257.34	40	8049.11	8	13555	25858.5
2021	high_water	D1	10.04	30.9508	tf	64939	280083	27792207	251930	703468	1407702	242.165	-10.92	33	6676.42	4	7432.74	28608.9
2022	high_water	D1	10.04	30.934	tf	0	147050	25643389	123684	555899	1385779	518.496	38.8996	37	6969.55	4	7717.01	28898.8
2023	high_water	D1	10.04	30.9167	tf	0	0	19727086	0	24444	1315709	1308.02	762.432	47	7765.52	4	8496.62	29681.8
2024	high_water	D1	10.04	30.8674	tf	0	0	4951771	0	0	766827	3142.42	1029.16	43	9296.17	4	10338.6	31276
2031	high_water	D1	9.78	30.8323	tf	0	85164	27016411	157578	691641	7693952	671.035	36.1366	25	1881.63	20	1280.75	31817.5
2032	high_water	D1	11.51	19.8	tf	0	18182	25747084	46352	387126	7912512	832.292	274.645	26	2138.91	20	1537.22	32006.3
2033	high_water	D1	9.66	29.9924	tf	0	0	19048532	0	26043	7736033	1653.45	697.326	43	2774.8	20	2193.05	31601.4
2034	high_water	D1	10.76	23.0861	tf	0	0	6772432	0	0	7559411	3204.64	1839.74	31	4578.02	36	3395.77	31037.7
2035	high_water	D1	9.81	28.9299	tf	0	0	216956	0	5877	1009092	4390.77	966.741	35	6739.95	20	6626.08	27801.2
2041	high_water	D1	9.39	29.9847	tf	0	0	16233034	8170	402716	8667215	2095.6	429.476	38	2992.35	36	2048.82	32295.5
2042	low_water	D1	3.57	32.7965	tf	0	0	14623063	0	259920	8558860	2349.74	533.689	40	3174.94	36	2043.34	32264.9
2043	high_water	D1	8.125	40.1694	tf	0	0	10635634	0	13	8161497	2890.78	996.341	44	3694.71	36	2279.75	32092.2
2044	high_water	D1	9.39	29.9431	tf	0	0	261209	0	0	5410253	4663.2	1169.43	38	5508.65	36	3795.26	31420.4
2051	high_water	D1	9.11	29.934	tf	166021	628039	14924244	1539	395211	13025623	165.19	462.474	30	2219.59	36	1777.97	36039.3
2052	high_water	D1	9.11	29.9215	tf	31554	321676	12958783	0	259861	12975673	347.194	529.918	31	2531.39	36	1837.65	36001.9
2053	high_water	D1	9.11	29.9097	tf	0	0	9147880	0	88626	13283942	999.269	715.108	33	3191.75	36	2290.27	36167.8
2054	high_water	D1	11.71	13.8021	tf	0	0	2649524	28990	79729	7937567	2964.2	280.937	35	5166.39	36	3950.92	36600.8
2055	high_water	D1	9.11	29.8403	tf	0	0	0	0	0	337584	5962.51	3153.98	37	8193.76	36	6584.34	36400.8
2061	high_water	D1	8.57	29.9834	tf	0	0	4858407	0	193748	11152448	3073.01	560.232	38	5922.37	112.889	2617.58	40753.8
2062	high_water	D1	8.57	29.9757	tf	0	0	4568278	0	79969	11281486	3174.76	814.801	32	5885.99	112.889	2795.9	40452.7
2063	high_water	D1	8.57	29.9632	tf	0	0	4186815	0	0	11246188	3429.3	1145.14	35	5822.87	112.889	3197.95	39827.4
2064	high_water	D1	8.57	30.0583	tf	0	0	0	0	0	3403923	5513.1	2582.8	38	7472.84	112.889	5389.1	38986.8
2065	high_water	D1	8.57	29.9292	tf	0	0	0	0	0	33395	7617.29	4886.38	31	9819.39	112.889	8438.76	38122.4
2071	high_water	D1	9.43	23.9215	tf	0	0	12148633	191626	793806	9174130	1744.95	149.997	31	5724.83	112.889	2272.3	43216.6
2072	high_water	D1	8.55	29.9681	tf	0	0	12881853	50592	584512	8960156	1758.01	335.67	40	5690.38	112.889	2408.06	43446.4
2073	high_water	D1	8.55	29.9507	tf	0	0	14428699	0	17970	8696045	1989.81	916.438	42	5697.8	112.889	2859.22	44028.6
2074	high_water	D1	8.55	29.9257	tf	11640	538320	20657457	0	0	5955100	455.958	2375.64	30	6273.13	112.889	4626.75	45891.5
2081	high_water	D1	8.28	29.9811	tf	0	61306	24352324	74424	433002	1081814	757.437	218.532	35	9652.41	4.5	1137.78	62883.8
2082	high_water	D1	8.28	29.9688	tf	0	0	21692596	353	179634	1081814	1028.95	493.597	34	9915.59	4.5	1414.47	63077.1
2083	high_water	D1	8.28	29.9618	tf	0	0	16531099	0	0	1081814	1602.16	1052.25	34	10404.2	4.5	2011.43	63668.2
2084	high_water	D1	8.28	29.9576	tf	0	0	2915875	0	0	1064444	3660.93	3104.54	34	12192.1	4.5	4085.81	65557.6
2091	high_water	D1	9.46	20.1153	tf	0	0	22225352	0	0	2090365	1144.26	1520.23	41	8466.76	10.8889	4620.19	55468.6
2092	high_water	D1	7.89	30.9853	tf	0	0	21780723	0	0	2091196	1152.77	1766.43	37	8563.53	10.8889	4835.74	55785.4
2093	high_water	D1	8.13	28.9278	tf	0	0	18943182	0	0	1752629	1293.96	2414.8	43	9028.46	10.8889	5454.67	56375.4
2094	high_water	D1	7.89	30.9514	tf	0	0	9863224	0	0	318394	2395.38	1078.26	40	10432.2	4.5	7007.13	58205.4
2095	high_water	D1	7.89	30.8972	tf	0	0	801716	0	0	5179	4353.51	1958.56	38	12569.2	4.5	7546.8	60166.4
2101	high_water	D1	10.54	10.4799	tf	785191	3141177	32695762	168913	935716	5577961	-1264.48	30.631	23	1933.91	17	2495.91	59441.8
2102	high_water	D1	7.46	29.9882	tf	785191	3141177	31131397	204001	986607	5460735	-1111.45	189.529	13	2144.67	17	2710.46	59397.8
3011	low_water	D1	1.8	29.9713	tf	0	0	0	318754	966562	8149821	7178.02	99.2199	33	16954.2	10	1242.04	16278
3012	low_water	D1	1.8	29.9625	tf	0	0	0	141817	778774	7864042	6899.75	202.687	34	17219.9	10	1451.14	16485.6
3013	low_water	D1	1.8	29.9549	tf	0	0	0	125631	203168	7065993	6234.8	-51.4808	39	17858.2	10	2024.88	16992.1
3014	low_water	D1	1.8	29.9458	tf	0	0	1591835	0	6043	4698760	4267.26	757.913	38	19779.6	10	3930.53	18588.7
3015	low_water	D1	1.8	29.9354	tf	0	0	13951870	0	0	596949	1279.88	1215.06	39	22762.6	10	6922.45	21338.4
3021	low_water	D1	1.75	29.9798	tf	0	0	0	287279	1445609	24490543	9443.31	48.5566	38	10695	6	1346	9531.65
3022	low_water	D1	1.75	29.9694	tf	0	0	0	71623	930313	24244024	9377.14	315.728	39	10571	6	1625.09	9593.09
3023	low_water	D1	1.75	29.9549	tf	0	0	0	0	131334	22709901	9398.43	706.526	36	10454.6	6	2239.97	9880.46
3024	low_water	D1	1.75	29.9319	tf	0	0	0	0	2590	14846364	9207.38	788.625	37	10327	6	4236.19	11001.8
3025	low_water	D1	1.75	29.8972	tf	0	0	0	0	0	2307548	8102.3	1026.03	38	10686	6	7278.7	12993.9
3031	low_water	D1	1.71	29.8538	tf	0	0	0	128117	676240	18300793	9354.03	90.3392	40	12907.6	20	2493.94	8864.09
3032	low_water	D1	1.73	28.775	tf	0	0	0	83000	493941	16744927	9519.18	162.289	41	13172.8	20	2668.96	9036.92
3033	low_water	D1	1.71	29.8299	tf	0	0	0	0	30245	12774848	10178.2	871.956	40	13911.1	20	3358.81	9706.36
3034	low_water	D1	1.71	29.8229	tf	0	0	0	0	3453	4743296	10583.1	590.689	41	15899.9	20	5176.07	11352
3035	low_water	D1	1.71	29.7931	tf	0	0	0	0	0	339976	8414.06	1085.78	35	18802.4	20	8023.48	13993.8
3041	low_water	D1	1.64	29.9104	tf	0	0	6181257	85331	535534	12866595	2939.61	132.966	37	13104.2	4	1641.24	10866.7
3042	low_water	D1	1.64	29.8986	tf	0	0	5006612	13702	316495	11887963	3225.98	398.913	37	13378.8	4	1932.61	10996.2
3043	low_water	D1	1.64	29.8882	tf	0	0	2759445	0	35979	10161657	3847.42	848.935	36	13932.9	4	2554.55	11216.6
3044	low_water	D1	1.64	29.8618	tf	0	0	0	0	863	3192741	5896.29	740.282	41	15849.5	4	4626.67	12443.7
3045	low_water	D1	1.64	29.8063	tf	0	0	0	0	0	166143	8802.44	3186.02	39	18504.3	4	7611.73	14403.1
3051	low_water	D1	1.76	14.7951	tf	0	0	14115490	9221	506255	10102085	1470.57	408.181	35	5473.49	28	5177.54	11419
3052	low_water	D1	1.57	29.9436	tf	0	0	13523482	0	152353	8619272	1647.37	685.529	30	5740.15	28	5483.44	11717.1
3053	low_water	D1	1.57	29.909	tf	0	0	11494684	863	2590	6240814	2113.65	147.035	23	6360.86	28	6136.48	12344.8
3054	low_water	D1	1.57	29.8701	tf	0	0	7387871	2590	3810	3289950	2863.49	4.93442	24	7245.4	28	8158.01	14352.3
3055	low_water	D1	1.57	29.8174	tf	0	0	82828	0	0	1528362	4592.28	1232.93	32	7918.6	28	11088.5	17246.1
3061	low_water	D1	1.46	29.985	tf	640705	2015122	39858718	8633	8633	286833	-220.44	281.831	22	4311.23	2	4333.05	62006.2
3062	low_water	D1	1.46	29.9764	tf	588896	2159549	38706290	0	8633	201147	35.9799	584.075	24	4419.04	2	4418.99	62046.1
3063	low_water	D1	1.46	29.8549	tf	520	324009	36950677	0	0	25035	480.55	1085.19	30	5259.94	2	5295.52	61044.5
3064	low_water	D1	1.46	29.8375	tf	0	0	29123971	0	0	20718	1074.89	3015.29	25	6471.14	5	6438.72	59006
3065	low_water	D1	1.46	29.8007	tf	0	0	21530610	0	1643	30214	1067.71	936.258	28	5067.64	5	7286.63	56555.2
3071	low_water	D1	1.44	29.9533	tf	785191	3141177	51777606	0	8384	279880	-1088.41	915.526	17	3557.46	9	3708.62	74673.2
3072	low_water	D1	1.44	29.9514	tf	785191	3120221	49564922	0	66427	281564	-883.069	683.769	18	3863.73	9	4020.03	74865.7
3073	low_water	D1	1.44	29.9437	tf	785052	2841508	45250760	39785	203819	229488	-490.637	320.627	8	4477.58	9	4626.62	75313.4
3074	low_water	D1	1.44	29.9215	tf	0	125461	29923478	0	0	209330	763.846	1294.76	37	6494.21	9	6635.03	76765.7
3075	low_water	D1	1.44	29.9049	tf	0	0	4182100	0	4089	197633	3734.17	924.696	64	9483.03	9	9574.61	79296.9
3081	low_water	D1	1.43	29.9645	tf	134341	333237	30097890	161004	593937	3196039	233.861	125.178	27	1012.68	11.5	798.024	74031
3082	low_water	D1	1.43	29.9486	tf	3302	249382	28343967	25410	275398	3282169	445.986	373.34	36	1301.37	11.5	1102.45	74165.2
3083	low_water	D1	1.43	29.941	tf	0	0	23547806	0	0	3476526	1124.29	1021.08	32	1990.7	11.5	1798.74	74340.7
3084	low_water	D1	1.43	29.7646	tf	0	0	16400762	0	863	3464922	1991.76	915.396	26	2882.5	11.5	3741.58	75511.4
3085	low_water	D1	1.43	29.8861	tf	0	0	18172695	0	0	2936172	2159.43	2094.45	26	4262.85	5.5	5535.75	77273.5
3091	low_water	D1	1.42	29.9622	tf	753433	2678325	40689358	22087	195881	481607	-308.973	163.3	17	3041.72	13.1667	5295.46	94273
3092	low_water	D1	1.42	29.9562	tf	594867	2267098	38258821	96927	282579	503218	-8.4313	86.3843	21	3337.51	13.1667	5610.43	94338.8
3093	low_water	D1	1.42	29.9493	tf	295817	826807	32564795	160244	273709	544178	-46.6542	109.461	17	4095.79	13.1667	6395.55	94436
3094	low_water	D1	1.42	29.9326	tf	0	0	14736775	0	0	605473	2084.68	1759.83	18	6535.25	13.1667	8714.09	93821
4011	low_water	D1	2.94	62.0883	tf	0	0	24021118	0	0	5066463	1485.75	1071.2	38	8740.01	14	1634.44	91821.5
4012	low_water	D1	2.94	61.8389	tf	0	0	21546930	0	0	4967276	1730.51	1393	39	9051.32	14	1953.35	92015.2
4013	low_water	D1	2.94	61.8069	tf	0	0	16145615	0	0	4546859	2332.9	1997.49	37	9672.99	14	2567.8	92200.5
4014	low_water	D1	2.94	61.9583	tf	0	0	1751718	0	0	2450850	4342.44	1311.36	40	11629.9	14	4550.7	92544.5
4015	low_water	D1	2.94	61.8139	tf	0	0	0	0	0	316667	7285.35	1910.13	67	14551.3	14	7520.81	93229.3
4022	low_water	D1	1.53	30.0614	tf	0	0	21428628	172487	1076540	3269742	1098.81	202.497	40	4409.95	7	2139.48	108746
4023	low_water	D1	1.53	29.8847	tf	0	0	17162032	0	62280	3231661	1609.84	831.05	37	4991.28	7	2739.54	108973
4024	low_water	D1	1.53	29.8687	tf	0	0	14093523	0	1727	3184707	1160.15	740.395	30	7230.65	7	3987.21	107859
4031	low_water	D1	1.6	30.0091	tf	470831	1592903	37024372	19793	316400	1489451	-18.1909	353.282	32	5893.12	12.6667	1854.71	113429
4032	low_water	D1	1.6	30.091	tf	346669	1444379	35343543	0	110031	1484750	79.3785	657.439	31	6173.24	12.6667	2172.1	113724
4033	low_water	D1	1.6	30.0694	tf	5354	919837	30911830	0	0	1479092	444.92	1231.45	21	6785.36	12.6667	2797.25	114029
4034	low_water	D1	1.6	30.0243	tf	0	0	12602727	0	0	1377204	1605.9	2868.86	30	8792.68	12.6667	4667.25	113578
4035	low_water	D1	1.6	29.9444	tf	0	0	118525	0	0	0	4379.94	5663.32	39	11717.8	12.6667	7566.85	113052
4041	low_water	D1	1.64	30.3624	tf	266429	1158005	30210563	60418	129348	1134983	19.4455	42.8873	26	3993.7	16	241.384	98681.6
4042	low_water	D1	1.64	30.341	tf	167746	968628	29149926	19714	87868	1099941	200.125	329.041	30	4271.67	16	462.051	98894.5
4043	low_water	D1	1.64	30.3035	tf	0	233055	25585459	0	22856	960823	733.785	860.597	27	4961.34	16	1148.3	99237.8
4044	low_water	D1	1.64	30.2299	tf	0	0	10802648	0	0	980896	1725.34	2306.21	31	6891.04	16	3135.73	99742
4045	low_water	D1	1.64	30.0597	tf	0	0	1256768	0	0	317109	3804.29	1531.55	47	9634.23	16	6064.1	102299
4051	low_water	D1	1.68	29.8896	tf	785191	3040314	48418691	0	0	1393402	-740.956	1596.36	22	4433.66	12	4649.22	102522
4053	low_water	D1	1.68	29.8493	tf	379573	1633408	42395364	0	0	1445922	58.6853	2108.1	22	5219.12	12	5410.06	102869
4054	low_water	D1	1.68	29.7951	tf	0	0	24990456	0	863	1401936	1727.41	805.251	21	7160.53	12	7348.08	102971
5011	high_water	D1	14.05	29.8657	tf	762698	2188777	13010034	0	0	2278697	-420.439	1505.22	28	9363.76	5.75	6256.82	73814.6
5012	high_water	D1	14.05	29.8653	tf	689576	2085332	12900458	0	0	2210218	-310.984	1451.17	27	9604.43	5.75	6460.38	73595.5
5013	high_water	D1	14.05	29.8653	tf	97682	892657	12693243	0	0	2208984	308.012	1539.69	30	10258.6	5.75	6536.23	73510.7
5014	high_water	D1	14.05	29.8681	tf	0	0	8436198	0	0	1125643	1916.46	1671.15	26	12233.4	5.75	7909.26	72396.1
5015	high_water	D1	14.05	29.8618	tf	0	0	408189	0	0	58037	4678.58	1299.25	61	15094.1	5.75	10368.1	70790.4
5021	high_water	D1	14.04	29.8898	tf	733090	2245685	13435024	0	4967	2776460	-395.766	971.327	23	7366.74	5.75	1113.49	79784.8
5022	high_water	D1	14.04	29.8944	tf	504613	1738490	13098296	0	0	2811039	-128.674	1001.55	29	7640.23	5.75	1383.62	79677.1
5023	high_water	D1	14.04	29.8903	tf	0	507788	12110601	0	0	2831012	545.348	1261.44	26	8332.67	5.75	2070.58	79400.1
5024	high_water	D1	14.04	29.891	tf	0	0	8022782	0	38506	2361923	2387.47	820.199	36	10308.3	5.75	4056.51	78803.1
5025	high_water	D1	14.04	29.8896	tf	0	0	644778	0	0	550263	4447.65	2972.76	56	12647.7	5.75	6437.42	78497
5031	high_water	D1	14.03	29.8771	tf	113053	779711	6828597	137669	285756	750159	292.91	122.118	35	13465	12.75	13423	93479.6
5032	high_water	D1	14.03	29.8861	tf	0	468562	6607073	105481	203922	738903	555.56	150.394	37	13705.5	12.75	13665.8	93736.3
5033	high_water	D1	14.03	29.8785	tf	0	507167	6334027	0	32321	723242	642.876	675.308	25	13503	16	13361.6	94400.1
5034	high_water	D1	14.03	29.8833	tf	0	409606	5687289	0	38033	723242	541.096	797.802	30	13584.4	16	12609.5	95863
5035	high_water	D1	14.03	29.875	tf	0	0	4814180	0	0	536941	1066.69	1011.03	45	13544.6	16	11770.4	97172.3
5041	high_water	D1	14.02	30.0944	tf	307926	1215427	7850949	0	0	606989	166.692	2423.73	28	12446	12.75	12367.2	89436.1
5042	high_water	D1	14.02	30.0951	tf	107085	815839	7668539	0	0	605584	311.626	2466.2	36	12559	12.75	12481.3	89187.5
5043	high_water	D1	14.02	30.0979	tf	31428	168320	7094992	0	0	597091	319.993	2106.9	36	13054.7	4	12620.6	88882.8
5044	high_water	D1	14.02	30.0792	tf	0	0	4188118	0	0	226172	2104.04	1733.05	36	14651.6	4	12636.4	87962.3
5045	high_water	D1	14.02	30.0868	tf	0	0	0	0	0	150576	5172.76	2559.55	50	13761.7	4	12136.3	85680.1
5052	high_water	D1	13.76	47.7169	tf	0	0	24856600	0	0	2237201	1234.21	1161.04	37	8072.55	10.8889	3495.5	52770.4
5053	high_water	D1	13.76	47.7729	tf	0	0	19215471	0	0	2090420	1875.35	1595.87	40	8737.13	10.8889	4145.29	52612.9
5054	high_water	D1	13.76	47.8007	tf	0	0	8154955	0	0	1677682	3268.57	2936.63	40	10198.9	10.8889	5599.43	52484.8
5055	high_water	D1	13.76	47.8847	tf	0	0	0	0	0	41402	5283.58	3623.02	40	12295.9	10.8889	7698.64	52582.7
5061	high_water	D1	13.72	48.0141	tf	0	0	8616869	228559	1213661	10932242	2238.94	39.3845	38	5832.18	112.889	1877.66	41737.9
5062	high_water	D1	13.72	48.0201	tf	0	0	7638430	34505	710766	10186195	2421.08	325.146	42	6126.45	112.889	2148.3	41931.2
5063	high_water	D1	14.1	6.36806	tf	0	0	5359913	0	1285	8824111	2948.33	975.462	42	6786.36	112.889	2794.16	42302.8
5064	high_water	D1	13.72	48.0389	tf	0	0	82485	0	0	4797427	4715.42	2922.19	36	8719.72	112.889	4755.35	43243.5
5065	high_water	D1	13.72	47.9694	tf	0	0	0	0	0	44027	5920.44	2424.58	37	11634.3	112.889	7754.06	45286.5
5072	high_water	D1	13.68	47.8678	tf	0	0	4229558	61638	522250	7194553	2596.8	321.321	41	3961.5	36	2067.83	33563.4
5073	high_water	D1	13.17	47.875	tf	0	0	2670324	0	47144	6247105	3214.05	861.261	42	4586.75	36	2696.87	33218.5
5074	high_water	D1	13.17	47.8875	tf	0	0	0	0	11206	2744889	5021.04	732.417	36	6647.82	36	4753.83	32994.9
5075	high_water	D1	13.17	47.909	tf	0	0	0	0	0	149312	7818.42	3631.18	44	9595.86	36	7705.37	32914.5
5081	high_water	D1	14	26.0843	tf	0	500319	25896341	25171	384857	2303653	545.562	337.862	35	5676.82	20	6681.94	24809.9
5082	high_water	D1	13.63	47.8264	tf	0	204809	24055215	0	167558	2305894	707.879	595.034	36	5648.46	20	6599.85	24884.9
5083	high_water	D1	13.63	47.8549	tf	0	0	18796958	0	0	2089453	1289.02	1268.92	36	5736.04	20	6562.75	24964.2
5084	high_water	D1	13.63	47.9243	tf	0	0	6720591	0	0	1764932	3133.42	2842.18	42	6492.59	20	6974.37	25155.1
5085	high_water	D1	13.63	48.0354	tf	0	0	0	32646	67930	445655	6262.11	110.108	38	9317.73	20	9521.98	24352.5
5091	high_water	D1	13.58	47.8579	tf	311476	1549917	30122826	0	160626	909993	99.9085	641.606	30	3578.55	4	8682.88	24353.1
5092	high_water	D1	13.58	47.8646	tf	55235	990950	27674610	0	182069	859354	340.375	525.701	35	3885.9	4	8903.03	24645.4
5093	high_water	D1	13.58	47.8688	tf	0	14099	23383776	0	113189	777075	916.496	614.056	33	4572.35	4	9447.29	25276.2
5094	high_water	D1	13.58	47.8778	tf	0	0	11972655	0	0	1022784	2663.7	1459.61	48	6348.54	4	11510.2	26511.4
5095	high_water	D1	13.58	47.8785	tf	0	0	0	0	6906	118621	5103.95	843.629	44	9027.09	4	14548.9	28325.1
5101	high_water	D1	13.51	47.8641	tf	0	0	153887	128479	369852	17012205	4649.54	81.4435	36	13366.5	4	2085.16	9225.67
5102	high_water	D1	13.51	47.8896	tf	0	0	52650	29341	285135	15054808	4807.44	309.044	33	13626.7	4	2348.79	9463.4
5103	high_water	D1	13.51	47.8771	tf	0	0	0	0	0	11295326	5472.9	1004.27	32	14302.3	4	3018.43	9838.8
5104	high_water	D1	13.51	47.8868	tf	0	0	0	0	0	3269353	7498.2	1930.46	36	16270.5	4	5022.49	11038.2
6011	high_water	D1	12.86	44.8914	tf	0	0	11613182	283289	2072630	34012918	2110.56	169.763	36	3066.27	28	1295.89	7364.48
6013	high_water	D1	12.86	44.9295	tf	0	0	8333643	465356	1685030	36187680	2674.4	-75.9121	26	3489.74	28	1511.4	7168.35
6022	high_water	D1	12.6	26.0556	tf	358425	931557	29462634	329829	738654	5481717	1.02039	-43.8931	23	408.056	12.75	367.509	87028.5
6023	high_water	D1	13.06	51.0497	tf	0	327342	26375082	9220	676562	5659778	558.43	408.271	29	1078.41	12.75	1008.2	87147.7
6024	high_water	D1	11.98	4.11042	tf	0	0	20171110	0	59568	6044717	1519.55	756.885	30	2078.23	12.75	2006.88	87153.3
6025	high_water	D1	13.06	51.0049	tf	0	0	15323774	0	55410	5808345	2425.06	851.109	23	3209.02	12.75	3142.9	86871.3
6033	high_water	D1	13	42.1959	tf	14073	698237	26561046	421673	1525022	6459838	370.44	-62.5161	17	2077.13	18.9167	1745.92	75276
6034	high_water	D1	12.86	33.9943	tf	0	0	18914203	31625	535786	6306165	1571.08	294.252	19	3250.8	18.9167	2815.49	75410.7
6042	high_water	D1	12.87	44.0139	tf	55153	852758	34173727	263791	1187241	4621631	209.408	32.3838	23	4114.81	25	875.451	112388
6044	high_water	D1	12.87	44.0139	tf	0	0	14548833	762	863	4421292	2162.08	469.019	25	5640.42	25	3481.65	113671
6045	high_water	D1	12.87	44.0521	tf	0	0	3523951	0	0	1776071	3508.89	1966.4	24	7640.69	25	5230.64	113377
TF01	low_water	D2	3.50344	34	tf	607885	2187079	52332213	35418	73359	121722	-171.514	293.994	22	8690.46	5	10418.1	68732.9
TF02	low_water	D2	4.00328	60	tf	271354	1529525	30532094	4316	7769	115817	169.393	93.0146	20	3672.9	5	6465.06	56200.4
TF03	low_water	D2	4.08828	62	tf	509239	1726517	41534553	8633	8633	338456	28.155	156.648	31	4326.13	2	4380.49	61824.1
TF04	low_water	D2	4.13469	62	tf	0	1157	24272343	0	20280	3404549	967.45	821.142	33	1825.84	11.5	1622.46	74189.4
TF05	low_water	D2	4.20969	69	tf	26155	718848	27902937	0	45019	3196692	366.594	733.048	31	1193.81	11.5	3655.71	76777.1
TF06	low_water	D2	4.96813	57	tf	119972	813049	35810632	225304	1133791	6297527	252.165	199.905	27	1532.26	5.5	1682.58	83850.8
TF07	low_water	D2	4.50281	32	tf	0	0	20210625	0	2111	163945	1170.5	954.241	28	7304.87	7	7132.2	100009
TF08A	low_water	D2	4.65719	30	tf	11377	578231	32655449	149278	891517	4074556	431.144	270.482	36	8808.68	14	2918.04	93993.7
TF08B	low_water	D2	5.8	36	tf	18588	641940	32899631	159659	968870	4031181	395.945	233.28	36	8819.76	14	2975.74	94055.8
TF09	low_water	D2	5.21219	62	tf	0	16474	22818606	261048	1301904	3267901	922.165	106.471	35	4429.55	7	1973.01	108565
TF10	low_water	D2	4.20219	36	tf	360430	1517527	16339166	0	0	4357826	28.2042	1293.07	22	6326.13	5.75	4611.01	84614.4
TF11	low_water	D2	5.03109	70	tf	190020	1470026	32921459	71129	158720	385289	242.511	199.896	19	3793.48	13.1667	6259.78	95176.4
TF12	low_water	D2	4.00047	64	tf	0	98076	31633575	88465	879209	4722181	680.184	268.458	24	3881.58	25	1228.45	112928
TF13	low_water	D2	4.9075	61	tf	312057	1406535	34940695	0	67795	1479534	55.9737	736.082	26	6242.02	12.6667	2250.42	113797
TF14	low_water	D2	5.37266	61	tf	2082	249709	36489559	7770	288880	615593	457.555	409.344	32	5085.92	16	3969.22	102701
TF15	low_water	D2	5.48109	65	tf	369894	1594999	36745062	0	0	338307	94.7589	1493.55	16	6863.48	12	7365.33	99227.5
TF16	low_water	D2	6.12156	55	tf	569670	1831305	41067001	60810	461279	1770267	-41.8247	257.648	25	8670.62	24.625	1112.05	91023.3
TF17	low_water	D2	NA	NA	tf	0	0	15203449	114279	242244	5048692	1566.82	79.8996	34	2864.66	12.75	2882.36	89172.9
TF18	low_water	D2	NA	NA	tf	16781	203661	20748907	27091	251262	844848	394.02	359.802	27	8223.91	6	1268.5	77605.8
TF18B	low_water	D2	5.76281	31	tf	378345	1528398	39191227	863	131147	1560019	-0.027121	416.96	24	5557.59	6	1578.67	77212.2
TF20	low_water	D2	6.03922	58	tf	0	0	12141855	22108	724042	8005270	1784.81	406.527	30	2265	27.2083	2184.05	66912.2
TF21	low_water	D2	NA	NA	tf	0	0	10101914	0	0	7488763	3045.8	1163.74	44	3509	27.2083	3437.65	64238.5
TF21A	low_water	D2	6.13922	58	tf	0	0	10173413	0	0	7509757	3083.68	1109.04	42	3544.29	27.2083	3482.33	64176.3
TF22	low_water	D2	5.98145	52	tf	0	768	23155191	0	0	2092091	974.859	1692.39	38	8407.26	10.8889	4733.17	55821.4
TF23	low_water	D2	NA	NA	tf	0	0	9055429	23462	421665	8789156	2225.45	354.539	39	6221	112.889	2539.58	43119.9
TF24	low_water	D2	NA	NA	tf	0	0	6454094	0	0	7314999	3446.52	1177.65	38	4278.73	36	2677.34	31949.6
TF25	low_water	D2	NA	NA	tf	0	0	3153880	0	193612	6560135	2764.92	516.761	35	4425.53	36	2548.37	33926.2
TF26	low_water	D2	4.35297	63	tf	4979	433862	27114870	309659	816468	4765475	439.104	70.6733	24	2931.29	25	2357.4	114399
TF27	low_water	D2	4.59812	66	tf	0	127576	27876672	48442	545386	6344330	788.694	210.994	28	2130.74	5.5	1834.96	81890.7
TF28	low_water	D2	5.83656	61	tf	27145	448261	31591888	191924	911914	1986899	276.669	134.377	29	9647.23	24.625	1763.71	92962.5
VZ01	low_water	D2	2.86594	63	vz	785191	3141177	47976123	0	156031	4839767	-1877.03	555.298	18	4893.45	25	1942.73	110187
VZ02	low_water	D2	2.86594	63	vz	0	316122	25606286	2175	153317	4196717	513.367	475.055	18	5763.44	25	2390.52	111709
VZ03	low_water	D2	3.10188	55	vz	785191	2637332	66618293	0	0	179061	-6812.69	1352.02	18	1262.63	7	2154.83	102930
VZ04	low_water	D2	3.10188	76	vz	567816	2255367	64997417	9603	12949	226894	-5804.84	305.817	16	440.321	7	2399.38	103756
VZ05	low_water	D2	3.16859	62	vz	726491	2455550	60712345	0	863	1010293	-5639.14	957.774	18	1513.18	9	2145.44	72075.9
VZ06	low_water	D2	3.93266	62	vz	785191	3141177	53143520	0	0	279079	-1186.43	1084.53	10	3336.43	9	3397.34	74761.1
VZ08	low_water	D2	3.91938	73	vz	745926	2343172	49589890	0	17560	1761930	-2579.55	711.987	17	613.355	9.5	5559.09	79760.6
VZ09	low_water	D2	4.93	63	vz	785191	2716048	69159867	0	0	153581	-4321.08	1488.92	9	847.628	9.5	5388.5	86626
VZ10	low_water	D2	5.18156	65	vz	785191	2697162	66902274	0	1727	337583	-4886.64	658.488	9	898.66	9.5	4644.55	87277.5
VZ11	low_water	D2	5.02109	66	vz	785191	3141177	61302658	0	0	449071	-2789.34	1428.16	14	1790.87	13.1667	2776.97	92742.4
VZ12	low_water	D2	5.64	71	vz	284369	1676600	63469301	863	4316	325624	-6332.61	413.031	17	572.765	13.1667	4006.14	90831.9
VZ13	low_water	D2	4.48641	43	vz	785191	2625442	66595265	0	0	175306	-6801.34	1292.11	17	1324.69	7	2126.36	102867
VZ14	low_water	D2	4.47241	58	vz	521779	2211661	65015813	11222	12949	229220	-5840.26	245.407	18	375.253	7	2329.94	103687
VZ15	low_water	D2	4.97219	72	vz	785191	3141177	51243879	0	0	617096	-1228.3	1735.2	24	4396.64	12	4800.81	101257
VZ16	low_water	D2	5.9	36	vz	785191	3141094	65756851	0	4	789868	-5993.75	997.95	17	468.892	12	2234.6	102441
VZ17	low_water	D2	5.29531	31	vz	783108	2782661	44886059	0	242	1095913	-457.816	987.169	17	1700.65	16	2231.13	97139
VZ18	low_water	D2	5.29531	31	vz	785191	2625748	53241226	863	47005	862962	-1653.44	342.413	18	483.424	16	3333.6	97058.7
VZ19	low_water	D2	5.54656	61	vz	182335	1054819	34906956	0	3014	1743886	125.584	906.758	18	9576.26	24.625	2182.16	90380.5
VZ20	low_water	D2	5.92156	31	vz	357254	1568268	36886291	201898	552234	1969783	22.4154	83.5598	24	9145.92	24.625	1846.03	93615.8
VZ21	low_water	D2	5.76281	44	vz	785191	3141177	68290390	0	0	632584	-3429.99	1445.26	20	1830.63	10.6667	1698.74	79260.2
VZ22A	low_water	D2	6.02	57	vz	785191	3141177	47976123	0	156031	4839767	-1877.03	555.298	18	4893.45	25	1942.73	110187
VZ23	low_water	D2	6.35922	58	vz	0	0	8675547	0	9632	7871357	2608.55	872.407	24	3049.09	27.2083	2844.98	65255.7
VZ24	low_water	D2	5.975	52	vz	785191	2668984	39064990	268096	489238	2115564	-572.375	-103.516	17	6619.39	10.8889	2663.31	54398.4
VZ25	low_water	D2	5.9929	52	vz	785191	3141177	61721848	0	13085	2514312	-2152.7	793.728	12	3753.93	10.8889	1019.18	53298.1
VZ26	low_water	D2	6.13806	30	vz	785191	2552750	29183394	574337	1327305	13750281	-671.099	-225.09	11	2528.04	112.889	1587.5	41445.6
VZ28	low_water	D2	6.43774	30	vz	0	0	7092260	90434	997107	9128086	1401.08	191.862	26	3148.19	36	1386.29	34625.7
TF01w	high_water	D2	14.0987	62	tf	607885	2187079	52332213	35418	73359	121722	-171.514	293.994	22	8690.46	5	10418.1	68732.9
TF02w	high_water	D2	14.0979	59	tf	271354	1529525	30532094	4316	7769	115817	169.393	93.0146	20	3672.9	5	6465.06	56200.4
TF03w	high_water	D2	14.1	30	tf	509239	1726517	41534553	8633	8633	338456	28.155	156.648	31	4326.13	2	4380.49	61824.1
TF04w	high_water	D2	14.1	30	tf	0	1157	24272343	0	20280	3404549	967.45	821.142	33	1825.84	11.5	1622.46	74189.4
TF05w	high_water	D2	14.0968	65	tf	26155	718848	27902937	0	45019	3196692	366.594	733.048	31	1193.81	11.5	3655.71	76777.1
TF06w	high_water	D2	14.4968	70	tf	119972	813049	35810632	225304	1133791	6297527	252.165	199.905	27	1532.26	5.5	1682.58	83850.8
TF07w	high_water	D2	14.0866	59	tf	0	0	20210625	0	2111	163945	1170.5	954.241	28	7304.87	7	7132.2	100009
TF08Aw	high_water	D2	14.0832	30	tf	11377	578231	32655449	149278	891517	4074556	431.144	270.482	36	8808.68	14	2918.04	93993.7
TF08Bw	high_water	D2	14.08	32	tf	18588	641940	32899631	159659	968870	4031181	395.945	233.28	36	8819.76	14	2975.74	94055.8
TF09w	high_water	D2	14.07	31	tf	0	16474	22818606	261048	1301904	3267901	922.165	106.471	35	4429.55	7	1973.01	108565
TF10w	high_water	D2	14.0763	62	tf	360430	1517527	16339166	0	0	4357826	28.2042	1293.07	22	6326.13	5.75	4611.01	84614.4
TF11w	high_water	D2	14.0819	60	tf	190020	1470026	32921459	71129	158720	385289	242.511	199.896	19	3793.48	13.1667	6259.78	95176.4
TF12w	high_water	D2	14.0656	61	tf	0	98076	31633575	88465	879209	4722181	680.184	268.458	24	3881.58	25	1228.45	112928
TF13w	high_water	D2	14.0565	60	tf	312057	1406535	34940695	0	67795	1479534	55.9737	736.082	26	6242.02	12.6667	2250.42	113797
TF14w	high_water	D2	14.0637	61	tf	2082	249709	36489559	7770	288880	615593	457.555	409.344	32	5085.92	16	3969.22	102701
TF15w	high_water	D2	14.0637	61	tf	369894	1594999	36745062	0	0	338307	94.7589	1493.55	16	6863.48	12	7365.33	99227.5
TF16w	high_water	D2	14.0687	60	tf	569670	1831305	41067001	60810	461279	1770267	-41.8247	257.648	25	8670.62	24.625	1112.05	91023.3
TF17w	high_water	D2	14.0455	60	tf	0	0	15203449	114279	242244	5048692	1566.82	79.8996	34	2864.66	12.75	2882.36	89172.9
TF18w	high_water	D2	14.0605	60	tf	16781	203661	20748907	27091	251262	844848	394.02	359.802	27	8223.91	6	1268.5	77605.8
TF18Bw	high_water	D2	NA	NA	tf	378345	1528398	39191227	863	131147	1560019	-0.027121	416.96	24	5557.59	6	1578.67	77212.2
TF20w	high_water	D2	14.03	61	tf	0	0	12141855	22108	724042	8005270	1784.81	406.527	30	2265	27.2083	2184.05	66912.2
TF21w	high_water	D2	14.0439	30	tf	0	0	10101914	0	0	7488763	3045.8	1163.74	44	3509	27.2083	3437.65	64238.5
TF21Aw	high_water	D2	14.04	31	tf	0	0	10173413	0	0	7509757	3083.68	1109.04	42	3544.29	27.2083	3482.33	64176.3
TF22w	high_water	D2	14.09	34	tf	0	768	23155191	0	0	2092091	974.859	1692.39	38	8407.26	10.8889	4733.17	55821.4
TF23w	high_water	D2	14.01	31	tf	0	0	9055429	23462	421665	8789156	2225.45	354.539	39	6221	112.889	2539.58	43119.9
TF24w	high_water	D2	14.01	42	tf	0	0	6454094	0	0	7314999	3446.52	1177.65	38	4278.73	36	2677.34	31949.6
TF25w	high_water	D2	14.0098	60	tf	0	0	3153880	0	193612	6560135	2764.92	516.761	35	4425.53	36	2548.37	33926.2
TF26w	high_water	D2	NA	NA	tf	4979	433862	27114870	309659	816468	4765475	439.104	70.6733	24	2931.29	25	2357.4	114399
TF27w	high_water	D2	14.1	31	tf	0	127576	27876672	48442	545386	6344330	788.694	210.994	28	2130.74	5.5	1834.96	81890.7
TF28w	high_water	D2	NA	NA	tf	27145	448261	31591888	191924	911914	1986899	276.669	134.377	29	9647.23	24.625	1763.71	92962.5
