# Supplementary material for: Seasonal dynamics of terrestrial vertebrate abundance between Amazonian flooded and unflooded forests
Source: PeerJ. 2018 Jun 27;6:e5058. doi: 10.7717/peerj.5058 (PMC6026452; doi:10.7717/peerj.5058)
Supplement: Supplemental Information 4 — Abbreviations and description of landscape and human disturbance variables extracted from 279 camera trap stations in the middle Juruá region, Amazonas, Brazil. [file peerj-06-5058-s004.xlsx]

## Sheet: Plan1
Abreviation	Description
camera_number	Camera trap field code
phase	Phase of the flood fulse the camera trap was deploied
sampledesign	Sample design the deploied camera trap is part of. D1 referes to sample design 1 and D2 to sample design 2
waterlevel	Mean daily water level of the Juruá river during the deployment period of each camera trap
tnights	Number of nights the camera trap was active
habitat	Habitat type the camaera trap was deploied. tf referesto terra firme and vz refers to várzea forest
vz500	Area (m²) of seasonally flooded forest within a 500m circular buffer centered at each camera trap
vz1k	Area (m²) of seasonally flooded forest within a 1000m circular buffer centered at each camera trap
vz5k	Area (m²) of seasonally flooded forest within a 5000m circular buffer centered at each camera trap
defor500	Total area (m²) of deforestation within a 500m circular buffer centered at each camera trap
defor1k	Total area (m²) of deforestation within a 1000m circular buffer centered at each camera trap
defor5k	Total area (m²) of deforestation within a 5000m circular buffer centered at each camera trap
vzdist	Euclidean distance from each camera trap to the nearest várzea forest
defordist	Euclidean distance from each camera trap to the nearest deforestation patch
elev	Elevation (m) of the camera trap above the main channel of the Juruá river.
riverdist	Distance from each camera trap to the midpoint of Juruá river
popcomm1	Number of residents of the local community nearest each camera trap
comdist1	Euclidean distance from each camera trap to the nearest local community
citydist	Euclidean distance from each camera trap to the nearest urban center
